# Supplementary material for: Longitudinal associations between school environment and mental health from childhood through early adulthood
Source: Research Square preprint supplement (doi:10.21203/rs.3.rs-8626819/v1), 2026-01-23
Supplement: Supplementary file 1 [file b3012f5e2639a6101e79156d.docx]

# Supplementary Material

**Longitudinal associations between school environment and mental health from childhood through early adulthood**

**Kaili Rimfeld, Rebecca Ferdinand, Anna Suarez, Agnieszka Gidzela, Jessica Deighton, Essi Viding, Margherita Malanchini, Dawn Watling, Robert Plomin, Kathleen Rastle**

Table of Contents

[Supplementary Material 1](#_Toc219471098)

[Supplementary Table S1. Descriptive statistics for mental health measures and educational experiences for the whole sample. 3](#_Toc219471099)

[Supplementary Table S2. Descriptive statistics for mental health measures and educational experiences for males and females separately, ANOVA results testing for sex differences. 8](#_Toc219471100)

[Supplementary Table S3. Factor loadings and model fit statistics for confirmatory factor analyses (CFA) for the general factor of psychopathology. 16](#_Toc219471101)

[Supplementary Table S4. Factor loadings and model fit statistics for confirmatory factor analyses (CFA) for the internalising factor of psychopathology. 21](#_Toc219471102)

[Supplementary Table S5. Factor loadings and model fit statistics for confirmatory factor analyses (CFA) for the externalising factor of psychopathology. 24](#_Toc219471103)

[Supplementary Table S6. Factor loadings and model fit statistics for confirmatory factor analyses (CFA) for the self-reported internalising factor of psychopathology. 28](#_Toc219471104)

[Supplementary Table S7. Contemporaneous correlations between educational experiences and mental health (p-factor) at ages 7, 9 and 16. 30](#_Toc219471105)

[Supplementary Table S8. Contemporaneous correlations between educational experiences and internalising factor at ages 7, 9 and 16. 32](#_Toc219471106)

[Supplementary Table S9. Contemporaneous correlations between educational experiences and externalising factor at ages 7, 9 and 16. 34](#_Toc219471107)

[Supplementary Table S10. Contemporaneous correlations between educational experiences and internalising factor using self-reported measures only at ages 9 and 16. 37](#_Toc219471108)

[Supplementary Table S11. Variance explained by linear regression in SEM models 39](#_Toc219471109)

[Supplementary Table S12. Variance explained using Elastic Net models 40](#_Toc219471110)

[Supplementary Table S13. Variance explained by linear regression 42](#_Toc219471111)

[Supplementary Table S14. Genetic, shared environmental and non-shared environmental components of variance for P-factor and poly-environmental score (PES) (95% CI) 43](#_Toc219471112)

[Supplementary Table S15. Results from bivariate genetic analyses illustrating the proportion of phenotypic variance explained by genetic, shared environmental and non-shared environmental factors 44](#_Toc219471113)

[Supplementary Table S16.Correlations between the genomic P factor and educational experiences 44](#_Toc219471114)

[Supplementary Table S17.Correlations between educational experiences and mental health at age 21 46](#_Toc219471115)

[Supplementary Table S18.Correlations between educational experiences and mental health at age 21, when controlling for SES 48](#_Toc219471116)

[Supplementary Table S19.Correlations between teacher-reported mental health and parent- and child-reported educational experiences 50](#_Toc219471117)

[Supplementary Table S20.Correlations between parent-reported mental health and teacher- and child-reported educational experiences 51](#_Toc219471118)

## **Supplementary Table S1.** Descriptive statistics for mental health measures and educational experiences for the whole sample.

| **Age 7** |  |  |  |  |  |  |  |  |
| --- | --- | --- | --- | --- | --- | --- | --- | --- |
|  | n | mean | SD | min | max | range | skew | kurtosis |
| SDQ prosocial total (parent) | 7829 | 8.172 | 1.779 | 9 | 8.405 | 1.483 | -1.03 | 0.861 |
| SDQ hyperactivity (parent) | 7827 | 3.647 | 2.574 | 3 | 3.463 | 2.965 | 0.545 | -0.476 |
| SDQ conduct total (parent) | 7828 | 1.735 | 1.649 | 1 | 1.521 | 1.483 | 1.106 | 1.291 |
| SDQ peer problem total (parent) | 7828 | 1.027 | 1.453 | 0 | 0.736 | 0 | 1.89 | 4.179 |
| SDQ emotion total (parent) | 7828 | 2.218 | 1.861 | 2 | 2.009 | 1.483 | 0.997 | 0.816 |
| SDQ prosocial total (teacher) | 6322 | 7.237 | 2.392 | 8 | 7.455 | 2.965 | -0.6 | -0.288 |
| SDQ hyperactivity total (teacher) | 6324 | 2.953 | 2.693 | 2 | 2.592 | 1.483 | 0.997 | 0.117 |
| SDQ conduct total (teacher) | 6321 | 0.744 | 1.386 | 0 | 0.405 | 0 | 2.551 | 7.775 |
| SDQ peer problem total (teacher) | 6318 | 1.091 | 1.498 | 0 | 0.798 | 0 | 1.717 | 3.175 |
| SDQ emotion total (teacher) | 6299 | 1.33 | 1.802 | 1 | 0.976 | 1.483 | 1.722 | 3.129 |
| Social (ASD) total (parent) | 7828 | 3.352 | 2.461 | 3 | 3.079 | 1.483 | 1.268 | 2.64 |
| Non-Social (ASD) total (parent) | 7827 | 3.693 | 2.166 | 3 | 3.545 | 1.483 | 0.623 | 0.163 |
| Social (ASD) total (teacher), | 6318 | 3.191 | 2.725 | 2.222 | 2.835 | 1.812 | 1.42 | 2.491 |
| Non-Social (ASD) total (teacher) | 6322 | 2.683 | 1.817 | 2 | 2.547 | 1.483 | 0.895 | 1.184 |
| Feelings about going to school (parent) | 7810 | 4.422 | 0.851 | 5 | 4.604 | 0 | -1.71 | 2.863 |
| Time off school | 4248 | 2.292 | 1.195 | 2 | 2.116 | 1.483 | 1.078 | 0.409 |
| **Age 9** |  |  |  |  |  |  |  |  |
|  | n | mean | SD | min | max | range | skew | kurtosis |
| CEQ Friends/Peer Context (parent) | 3374 | 1.45 | 0.406 | 0 | 2 | 2 | -0.281 | -0.53 |
| CEQ Friends/Peer Context (teacher) | 2887 | 1.677 | 0.38 | 0 | 2 | 2 | -1.102 | 0.734 |
| CEQ Friends/Peer Context (child) | 3305 | 1.352 | 0.435 | 0 | 2 | 2 | -0.415 | -0.147 |
| CEQ Classroom Satisfaction (parent) | 3395 | 1.625 | 0.404 | 0 | 2 | 2 | -1.001 | 0.404 |
| CEQ Classroom Satisfaction (teacher) | 2885 | 1.678 | 0.403 | 0 | 2 | 2 | -1.163 | 0.673 |
| CEQ Classroom Satisfaction (child) | 3314 | 1.488 | 0.464 | 0 | 2 | 2 | -0.835 | 0.163 |
| CEQ Teachers (parent) | 3392 | 1.72 | 0.387 | 0 | 2 | 2 | -1.321 | 1.082 |
| CEQ Teachers (child) | 3311 | 1.585 | 0.459 | 0 | 2 | 2 | -1.13 | 0.811 |
| CEQ Negative Affect (parent) | 3392 | 0.294 | 0.406 | 0 | 2 | 2 | 1.593 | 2.299 |
| CEQ Negative Affect (child) | 3311 | 0.283 | 0.435 | 0 | 2 | 2 | 1.748 | 2.785 |
| CEQ Adventure (parent) | 3395 | 1.382 | 0.457 | 0 | 2 | 2 | -0.358 | -0.659 |
| CEQ Adventure (child) | 3313 | 1.163 | 0.541 | 0 | 2 | 2 | -0.164 | -0.789 |
| CEQ Opportunity (parent) | 3391 | 1.712 | 0.331 | 0.25 | 2 | 1.75 | -1.09 | 0.41 |
| CEQ Opportunity (child) | 3313 | 1.735 | 0.34 | 0 | 2 | 2 | -1.535 | 2.391 |
| CEQ Acceptance (parent) | 3315 | 1.481 | 0.457 | 0 | 2 | 2 | -0.757 | 0.071 |
| CEQ Acceptance (child) | 3394 | 1.762 | 0.357 | 0 | 2 | 2 | -1.716 | 2.897 |
| Class size | 2896 | 2.208 | 0.547 | 1 | 3 | 2 | 0.075 | -0.177 |
| Homework: nights per week (teacher) | 2872 | 2.333 | 1.327 | 0 | 5 | 5 | 0.774 | -0.384 |
| Homework: usually finishes (teacher) | 2865 | 3.517 | 0.771 | 0 | 4 | 4 | -1.713 | 2.813 |
| Homework: involves others (teacher) | 2818 | 0.525 | 0.499 | 0 | 1 | 1 | -0.101 | -1.991 |
| SDQ Prosocial scale (parent) | 3407 | 8.253 | 1.723 | 0 | 10 | 10 | -1.042 | 0.868 |
| SDQ Hyperactivity scale (parent) | 3402 | 3.277 | 2.406 | 0 | 10 | 10 | 0.827 | 0.143 |
| SDQ Conduct scale (parent) | 3405 | 1.32 | 1.479 | 0 | 10 | 10 | 1.509 | 3.164 |
| SDQ Peer Problem scale (parent) | 3405 | 1.087 | 1.558 | 0 | 9 | 9 | 1.937 | 4.208 |
| SDQ Emotion scale (parent) | 3405 | 1.786 | 1.952 | 0 | 10 | 10 | 1.334 | 1.561 |
| SDQ Prosocial scale (child self-report) | 3372 | 7.886 | 1.848 | 1 | 10 | 9 | -0.595 | -0.44 |
| SDQ Hyperactivity scale (child self-report) | 3368 | 3.893 | 2.275 | 0 | 10 | 10 | 0.242 | -0.574 |
| SDQ Conduct scale (child self-report) | 3366 | 2.214 | 1.864 | 0 | 10 | 10 | 0.904 | 0.564 |
| SDQ Peer Problem scale (child self-report) | 3350 | 1.966 | 1.772 | 0 | 10 | 10 | 1.006 | 0.924 |
| SDQ Emotion scale (child self-report) | 3361 | 3.28 | 2.382 | 0 | 10 | 10 | 0.55 | -0.385 |
| SDQ Prosocial scale (teacher) | 2891 | 7.51 | 2.309 | 0 | 10 | 10 | -0.754 | -0.232 |
| SDQ Hyperactivity scale (teacher) | 2880 | 2.639 | 2.496 | 0 | 10 | 10 | 1.08 | 0.582 |
| SDQ Conduct scale (teacher) | 2884 | 0.555 | 1.253 | 0 | 9 | 9 | 3.149 | 11.355 |
| SDQ Peer Problem scale (teacher) | 2895 | 0.887 | 1.477 | 0 | 10 | 10 | 2.308 | 6.308 |
| SDQ Emotion scale (teacher) | 2893 | 1.386 | 1.831 | 0 | 10 | 10 | 1.618 | 2.664 |
| CAST Social scale at 9 (parent), 0-14 | 3405 | 2.466 | 1.858 | 0 | 11 | 11 | 0.781 | 0.664 |
| CAST Non-Social scale at 9 (parent), 0-10 | 3400 | 2.158 | 1.58 | 0 | 10 | 10 | 0.9 | 1.182 |
| CAST Communication scale at 9 (parent) | 3403 | 2.389 | 2.039 | 0 | 13 | 13 | 1.122 | 1.597 |
| CAST Social scale at 9 (child self-report) | 3254 | 4.42 | 2.34 | 0 | 14 | 14 | 0.432 | 0.151 |
| CAST Non-Social scale at 9 (child self-report) | 3259 | 3.963 | 2.102 | 0 | 12 | 12 | 0.643 | 0.131 |
| CAST Communication scale at 9 (child self-report) | 3258 | 3.438 | 2.605 | 0 | 12 | 12 | 0.738 | 0.111 |
| CAST Social scale at 9 (teacher) | 2892 | 2.62 | 2.21 | 0 | 14 | 14 | 1.337 | 2.58 |
| CAST Non-Social scale at 9 (teacher) | 2891 | 1.636 | 1.517 | 0 | 10 | 10 | 1.339 | 2.51 |
| CAST Communication scale at 9 (teacher) | 2894 | 2.338 | 2.364 | 0 | 14 | 14 | 1.357 | 1.973 |
| APSD Narcissism scale (parent) | 3404 | 1.926 | 2.072 | 0 | 14 | 14 | 1.639 | 3.338 |
| APSD Impulsivity scale (parent) | 3409 | 3.313 | 2.104 | 0 | 10 | 10 | 0.497 | -0.111 |
| APSD Narcissism scale (teacher) | 2892 | 1.227 | 2.188 | 0 | 14 | 14 | 2.411 | 6.29 |
| APSD Impulsivity scale (teacher) | 2892 | 1.651 | 1.987 | 0 | 10 | 10 | 1.403 | 1.629 |

| **Age 16** |  |  |  |  |  |  |  |  |
| --- | --- | --- | --- | --- | --- | --- | --- | --- |
|  | n | mean | SD | min | max | range | skew | kurtosis |
| SDQ Hyperactivity scale (parent behaviour qnr at 16), 0-10 | 5116 | 2.313 | 2.001 | 0 | 10 | 10 | 1.165 | 1.445 |
| SDQ Conduct scale (parent behaviour qnr at 16), 0-10 | 5124 | 1.257 | 1.412 | 0 | 10 | 10 | 1.555 | 3.276 |
| SDQ Prosocial scale (parent behaviour qnr at 16), 0-10 | 5120 | 8.223 | 1.955 | 0 | 10 | 10 | -1.15 | 0.913 |
| SDQ Emotion scale (child behaviour qnr at 16), 0-10 | 5097 | 2.733 | 2.241 | 0 | 10 | 10 | 0.767 | 0.021 |
| SDQ Peer Problems scale (child behaviour qnr at 16), 0-10 | 5098 | 1.556 | 1.506 | 0 | 10 | 10 | 1.359 | 2.386 |
| SDQ Hyperactivity scale (child behaviour qnr at 16), 0-10 | 5098 | 3.594 | 2.312 | 0 | 10 | 10 | 0.48 | -0.293 |
| SDQ Conduct scale (child behaviour qnr at 16), 0-10 | 5096 | 1.66 | 1.481 | 0 | 10 | 10 | 1.263 | 1.93 |
| SDQ Prosocial scale (child behaviour qnr at 16), 0-10 | 5096 | 7.127 | 1.938 | 0 | 10 | 10 | -0.452 | -0.237 |
| MFQ total scale (child) | 5102 | 3.576 | 4.378 | 0 | 26 | 26 | 1.983 | 4.564 |
| MFQ total scale (parent) | 5123 | 1.017 | 2.351 | 0 | 22 | 22 | 3.927 | 19.306 |
| ARBQ Anxiety total scale (parent) | 5126 | 3.671 | 4.294 | 0 | 33.778 | 33.778 | 2.066 | 5.843 |
| Conners Impulsivity scale (parent) | 5119 | 2.668 | 3.627 | 0 | 27 | 27 | 2.478 | 7.883 |
| Conners Inattention scale (parent) | 5119 | 4.313 | 4.989 | 0 | 27 | 27 | 1.741 | 3.406 |
| Conners Emotional Lability scale (parent) | 5121 | 1.308 | 1.859 | 0 | 9 | 9 | 1.83 | 3.302 |
| ICUT Callous scale (child) | 1126 | 5.322 | 3.537 | 0 | 26 | 26 | 1.495 | 3.119 |
| ICUT Callous scale (parent) | 5121 | 4.754 | 3.654 | 0 | 29 | 29 | 1.639 | 4.32 |
| ICUT Unemotional scale (child) | 1125 | 7.677 | 3.111 | 0 | 15 | 15 | 0.102 | -0.099 |
| ICUT Unemotional scale (parent) | 5126 | 5.217 | 2.938 | 0 | 15 | 15 | 0.479 | 0.095 |
| ICUT Uncaring scale (child) | 1125 | 6.55 | 3.739 | 0 | 24 | 24 | 0.792 | 0.894 |
| ICUT Uncaring scale (parent) | 5126 | 7.703 | 4.829 | 0 | 24 | 24 | 0.543 | -0.262 |
| Autism Quotient Social scale (child) | 5098 | 6.972 | 4.164 | 0 | 24 | 24 | 0.782 | 0.725 |
| Autism Quotient Social scale (parent) | 5124 | 7.353 | 4.756 | 0 | 27 | 27 | 0.831 | 0.63 |
| Autism Quotient Attention Switching scale (parent) | 5121 | 8.324 | 4.242 | 0 | 24 | 24 | 0.452 | 0.201 |
| Autism Quotient Imagination scale (parent) | 5099 | 4.368 | 3.364 | 0 | 18 | 18 | 0.753 | 0.496 |
| Autism Quotient Attention to Detail scale (child) | 5097 | 4.866 | 3.531 | 0 | 15 | 15 | 0.479 | -0.397 |
| Autism Quotient Attention to Detail scale (parent) | 5106 | 4.379 | 3.8 | 0 | 15 | 15 | 0.731 | -0.309 |
| Subjective Happiness Scale overall mean score (child) | 5097 | 5.123 | 0.955 | 1 | 7 | 6 | -0.511 | 0.449 |
| CASI Anxiety total scale (child) | 5101 | 7.968 | 5.944 | 0 | 36 | 36 | 1.138 | 1.371 |
| SWAN Inattention mean score (child) | 1130 | 4.689 | 0.88 | 1.222 | 7 | 5.778 | -0.082 | 0.26 |
| SWAN Hyperactivity mean score (child) | 1129 | 4.821 | 0.995 | 1.333 | 7 | 5.667 | -0.036 | -0.358 |
| School Engagement: Teacher-Student Relations | 2624 | 2.906 | 0.739 | 1 | 4 | 3 | -0.602 | -0.203 |
| School Engagement: Control/Relevance of School Work | 2621 | 2.859 | 0.662 | 1 | 4 | 3 | -0.498 | -0.091 |
| School Engagement: Peer Support for Learning | 2618 | 2.891 | 0.754 | 1 | 4 | 3 | -0.572 | -0.036 |
| School Engagement: Future Aspirations/Goals | 2617 | 3.262 | 0.958 | 1 | 4 | 3 | -1.291 | 0.414 |
| PISA Homework Behaviour scale (child) | 2649 | 4.465 | 1.125 | 0 | 6 | 6 | -0.636 | 0.213 |
| PISA Homework Feedback scale (child) | 2624 | 4.976 | 1.77 | 0 | 9 | 9 | -0.087 | 0.023 |
| PISA Attitudes to School overall mean score (child) | 2649 | 3.238 | 0.589 | 1 | 4 | 3 | -0.77 | 0.468 |
| Life Satisfaction School mean score (child) | 2798 | 4.293 | 1.019 | 1 | 6 | 5 | -0.749 | 0.424 |
| PISA Maths Interest overall | 2632 | 2.538 | 0.953 | 1 | 4 | 3 | -0.078 | -1.045 |
| PISA Time Spent on Maths total | 2602 | 4.456 | 1.725 | 0 | 12 | 12 | 0.413 | 1.401 |
| EWQB Classroom Environment, work in small groups | 2621 | 1.189 | 0.706 | 0 | 3 | 3 | 0.534 | 0.462 |
| EWQB Classroom Environment, help each other | 2602 | 1.909 | 0.791 | 0 | 3 | 3 | -0.272 | -0.488 |
| EWQB Classroom Environment, first to answe | 2612 | 1.86 | 0.89 | 0 | 3 | 3 | -0.237 | -0.849 |
| EWQB Classroom Environment, first to finish | 2614 | 1.87 | 0.932 | 0 | 3 | 3 | -0.328 | -0.865 |
| EWQB Classroom Environment, show each other work | 2610 | 1.842 | 0.898 | 0 | 3 | 3 | -0.294 | -0.76 |
| EWQB Classroom Environment, tell each other reports | 2610 | 2.048 | 0.819 | 0 | 3 | 3 | -0.474 | -0.472 |
| EWQB Classroom Environment, makes work interesting | 2613 | 1.73 | 0.88 | 0 | 3 | 3 | -0.159 | -0.739 |
| EWQB Classroom Environment, teacher likes work | 2606 | 1.946 | 0.79 | 0 | 3 | 3 | -0.306 | -0.483 |
| EWQB Classroom Environment, teacher explains why | 2604 | 1.759 | 0.906 | 0 | 3 | 3 | -0.203 | -0.807 |
| EWQB Classroom Environment, wait a long time | 2607 | 1.307 | 0.838 | 0 | 3 | 3 | 0.569 | -0.191 |
| EWQB Classroom Environment, shows an interest | 2610 | 1.95 | 0.877 | 0 | 3 | 3 | -0.377 | -0.719 |
| EWQB Classroom Environment, express opinions | 2606 | 1.832 | 0.869 | 0 | 3 | 3 | -0.274 | -0.671 |
| EWQB Classroom Environment, continues teaching | 2608 | 2.179 | 0.861 | 0 | 3 | 3 | -0.733 | -0.361 |
| EWQB Classroom Environment, does a lot to help | 2611 | 2.189 | 0.838 | 0 | 3 | 3 | -0.721 | -0.315 |
| EWQB Classroom Environment, checks homework | 2601 | 2.181 | 0.838 | 0 | 3 | 3 | -0.679 | -0.422 |
| EWQB Classroom Environment, cannot work well | 2606 | 0.739 | 0.7 | 0 | 3 | 3 | 0.777 | 0.679 |
| WQB Classroom Environment, do not listen | 2609 | 0.889 | 0.724 | 0 | 3 | 3 | 0.722 | 0.774 |
| EWQB Classroom Environment, noise and disorder | 2598 | 1.038 | 0.797 | 0 | 3 | 3 | 0.706 | 0.371 |
| EWQB Classroom Environment, doing nothing | 2609 | 1.345 | 0.956 | 0 | 3 | 3 | 0.346 | -0.802 |

| **Age 21** |  |  |  |  |  |  |  |  |
| --- | --- | --- | --- | --- | --- | --- | --- | --- |
|  | n | mean | SD | min | max | range | skew | kurtosis |
| SDQ Emotion total score (parent) | 5337 | 2.422 | 2.335 | 0 | 10 | 10 | 1.047 | 0.477 |
| SDQ Emotion total score (twin) | 4724 | 3.602 | 2.7 | 0 | 10 | 10 | 0.5 | -0.706 |
| SDQ Conduct total score (parent) | 5345 | 1.245 | 1.321 | 0 | 10 | 10 | 1.816 | 5.386 |
| SDQ Conduct total score (twin) | 4724 | 1.568 | 1.311 | 0 | 9 | 9 | 1.507 | 3.419 |
| SDQ Hyperactivity total score (parent) | 5338 | 1.976 | 2.04 | 0 | 10 | 10 | 1.333 | 1.703 |
| SDQ Hyperactivity total score (twin) | 4723 | 3.31 | 2.178 | 0 | 10 | 10 | 0.498 | -0.258 |
| SDQ Peer problems total score (parent) | 5341 | 1.441 | 1.762 | 0 | 10 | 10 | 1.469 | 2.034 |
| SDQ Peer problems total score (twin) | 4724 | 2.18 | 1.805 | 0 | 10 | 10 | 0.906 | 0.725 |
| SDQ Prosocial total score (parent) | 5347 | 8.116 | 1.992 | 0 | 10 | 10 | -1.207 | 1.132 |
| SDQ Prosocial total score (twin) | 4726 | 7.643 | 1.878 | 0 | 10 | 10 | -0.764 | 0.15 |
| MFQ overall total score (twin) | 4722 | 4.432 | 4.086 | 0 | 16 | 16 | 0.972 | 0.137 |
| MFQ overall total score (twin) | 4224 | 3.794 | 3.823 | 0 | 16 | 16 | 1.154 | 0.659 |
| Conners Impulsivity total score (parent) | 5337 | 2.584 | 3.81 | 0 | 27 | 27 | 2.344 | 6.623 |
| Conners Inattention total score (parent) | 5343 | 4.097 | 4.724 | 0 | 27 | 27 | 1.92 | 4.416 |
| General Anxiety overall total score (twin ) | 4222 | 7.3 | 7.418 | 0 | 40 | 40 | 1.553 | 2.293 |
| BAQ Physical Aggression mean score (twin) | 4656 | 2.335 | 1.074 | 1 | 5 | 4 | 0.449 | -0.825 |
| BAQ Verbal Aggression mean score (twin) | 4656 | 3.055 | 0.861 | 1 | 5 | 4 | -0.009 | -0.472 |
| BAQ Anger mean score (twin) | 4656 | 2.023 | 1.067 | 1 | 5 | 4 | 0.924 | -0.059 |
| SANS overall total score (twin) | 5329 | 3.344 | 4.458 | 0 | 30 | 30 | 2.315 | 6.661 |
| SPEQ Paranoia total score (twin) | 4283 | 9.934 | 11.435 | 0 | 74 | 74 | 1.966 | 4.682 |
| SPEQ Hallucinations total score (twin) | 4283 | 1.726 | 4.167 | 0 | 44 | 44 | 4.446 | 25.814 |

## **Supplementary Table S2.** Descriptive statistics for mental health measures and educational experiences for males and females separately, ANOVA results testing for sex differences.

| **Age 7** |  |  |  |  |  |  |  |  |  |  |
| --- | --- | --- | --- | --- | --- | --- | --- | --- | --- | --- |
|  | male_mean | male_sd m | male_n | female_mean | female_sd fe | female_n | F_value | p_value | p_fdr sig | r_squared |
|  |  |  |  |  |  |  |  |  |  |
| SDQ prosocial total (parent) | 8.461 | 1.615 | 4001 | 7.871 | 1.889 | 3828 | 221.215 | 2.31E-49 | 9.24E-49 | 0.027 |
| SDQ hyperactivity (parent) | 3.211 | 2.408 | 3999 | 4.102 | 2.662 | 3828 | 241.330 | 1.27E-53 | 6.76E-53 | 0.030 |
| SDQ conduct total (parent) | 1.574 | 1.544 | 4001 | 1.904 | 1.737 | 3827 | 78.977 | 7.70E-19 | 1.54E-18 | 0.010 |
| SDQ peer problem total (parent) | 0.915 | 1.320 | 4001 | 1.145 | 1.572 | 3827 | 49.061 | 2.69E-12 | 4.30E-12 | 0.006 |
| SDQ emotion total (parent) | 2.351 | 1.895 | 4001 | 2.078 | 1.814 | 3827 | 42.190 | 8.79E-11 | 1.28E-10 | 0.005 |
| SDQ prosocial total (teacher) | 7.812 | 2.150 | 3228 | 6.638 | 2.483 | 3094 | 404.993 | 2.35E-87 | 1.88E-86 | 0.060 |
| SDQ hyperactivity total (teacher) | 2.281 | 2.277 | 3228 | 3.653 | 2.906 | 3096 | 438.394 | 3.58E-94 | 5.73E-93 | 0.065 |
| SDQ conduct total (teacher) | 0.539 | 1.159 | 3227 | 0.957 | 1.561 | 3094 | 146.760 | 2.07E-33 | 4.74E-33 | 0.023 |
| SDQ peer problem total (teacher) | 0.977 | 1.394 | 3228 | 1.210 | 1.590 | 3090 | 38.445 | 5.99E-10 | 7.98E-10 | 0.006 |
| SDQ emotion total (teacher) | 1.372 | 1.842 | 3210 | 1.286 | 1.759 | 3089 | 3.572 | 5.88E-02 | 6.72E-02 | 0.001 |
| Social (ASD) total (parent) | 3.152 | 2.298 | 4001 | 3.560 | 2.605 | 3827 | 54.053 | 2.15E-13 | 3.82E-13 | 0.007 |
| Non-Social (ASD) total (parent) | 3.666 | 2.090 | 4000 | 3.721 | 2.243 | 3827 | 1.256 | 2.62E-01 | 2.80E-01 | 0.000 |
| Social (ASD) total (teacher), | 2.772 | 2.428 | 3228 | 3.629 | 2.941 | 3090 | 160.208 | 2.80E-36 | 8.97E-36 | 0.025 |
| Non-Social (ASD) total (teacher) | 2.615 | 1.641 | 3226 | 2.754 | 1.981 | 3096 | 9.254 | 2.36E-03 | 2.90E-03 | 0.001 |
| Feelings about going to school (parent) | 4.537 | 0.763 | 3991 | 4.301 | 0.919 | 3819 | 153.080 | 7.79E-35 | 2.08E-34 | 0.019 |
| Time Off School | 2.293 | 1.178 | 2194 | 2.291 | 1.213 | 2054 | 0.003 | 9.58E-01 | 9.58E-01 | 0.000 |

| **Age 9** |  |  |  |  |  |  |  |  |  |  |
| --- | --- | --- | --- | --- | --- | --- | --- | --- | --- | --- |
|  | male_mean | male_sd | male_n | female_mean | female_sd | female_n | F_value | p_value | p_fdr | r_squared |
| CEQ Friends/Peer Context (parent) | 1.528 | 0.379 | 1758 | 1.364 | 0.417 | 1616 | 142.286 | 3.70E-32 | 2.54E-31 | 0.040 |
| CEQ Friends/Peer Context (teacher) | 1.757 | 0.328 | 1502 | 1.590 | 0.413 | 1385 | 145.099 | 1.22E-32 | 9.79E-32 | 0.048 |
| CEQ Friends/Peer Context (child) | 1.427 | 0.421 | 1745 | 1.267 | 0.436 | 1560 | 115.145 | 1.98E-26 | 8.66E-26 | 0.034 |
| CEQ Classroom Satisfaction (parent) | 1.686 | 0.380 | 1770 | 1.559 | 0.420 | 1625 | 86.338 | 2.64E-20 | 8.43E-20 | 0.025 |
| CEQ Classroom Satisfaction (teacher) | 1.756 | 0.349 | 1501 | 1.593 | 0.439 | 1384 | 123.069 | 4.93E-28 | 2.63E-27 | 0.041 |
| CEQ Classroom Satisfaction (child) | 1.556 | 0.433 | 1750 | 1.413 | 0.485 | 1564 | 80.184 | 5.56E-19 | 1.57E-18 | 0.024 |
| CEQ Teachers (parent) | 1.729 | 0.387 | 1767 | 1.710 | 0.385 | 1625 | 2.127 | 1.45E-01 | 1.70E-01 | 0.001 |
| CEQ Teachers (child) | 1.620 | 0.451 | 1748 | 1.545 | 0.464 | 1563 | 22.185 | 2.58E-06 | 3.64E-06 | 0.007 |
| CEQ Negative Affect (parent) | 0.303 | 0.412 | 1767 | 0.284 | 0.400 | 1625 | 1.828 | 1.76E-01 | 2.02E-01 | 0.001 |
| CEQ Negative Affect (child) | 0.278 | 0.430 | 1750 | 0.288 | 0.441 | 1561 | 0.482 | 4.88E-01 | 4.98E-01 | 0.000 |
| CEQ Adventure (parent) | 1.466 | 0.441 | 1769 | 1.290 | 0.457 | 1626 | 131.228 | 7.75E-30 | 4.65E-29 | 0.037 |
| CEQ Adventure (child) | 1.221 | 0.527 | 1749 | 1.098 | 0.550 | 1564 | 43.758 | 4.32E-11 | 8.64E-11 | 0.013 |
| CEQ Opportunity (parent) | 1.723 | 0.334 | 1768 | 1.701 | 0.328 | 1623 | 3.981 | 4.61E-02 | 5.67E-02 | 0.001 |
| CEQ Opportunity (child) | 1.762 | 0.320 | 1749 | 1.705 | 0.360 | 1564 | 23.413 | 1.37E-06 | 1.99E-06 | 0.007 |
| CEQ Acceptance (parent) | 1.490 | 0.454 | 1752 | 1.470 | 0.460 | 1563 | 1.734 | 1.88E-01 | 2.10E-01 | 0.001 |
| CEQ Acceptance (child) | 1.787 | 0.343 | 1769 | 1.734 | 0.371 | 1625 | 18.580 | 1.68E-05 | 2.30E-05 | 0.005 |
| Class size | 2.219 | 0.536 | 1500 | 2.196 | 0.559 | 1396 | 1.290 | 2.56E-01 | 2.67E-01 | 0.000 |
| Homework: nights per week (teacher) | 2.346 | 1.322 | 1491 | 2.318 | 1.332 | 1381 | 0.324 | 5.69E-01 | 5.69E-01 | 0.000 |
| Homework: usually finishes (teacher) | 3.605 | 0.696 | 1493 | 3.421 | 0.835 | 1372 | 41.392 | 1.46E-10 | 2.69E-10 | 0.014 |
| Homework: involves others (teacher) | 0.514 | 0.500 | 1469 | 0.537 | 0.499 | 1349 | 1.554 | 2.13E-01 | 2.27E-01 | 0.001 |
| SDQ Prosocial scale (parent) | 8.599 | 1.479 | 1774 | 7.877 | 1.883 | 1633 | 155.745 | 5.54E-35 | 5.32E-34 | 0.044 |
| SDQ Hyperactivity scale (parent) | 2.848 | 2.155 | 1770 | 3.742 | 2.573 | 1632 | 121.317 | 9.54E-28 | 4.58E-27 | 0.034 |
| SDQ Conduct scale (parent) | 1.166 | 1.358 | 1772 | 1.487 | 1.583 | 1633 | 40.549 | 2.17E-10 | 3.87E-10 | 0.012 |
| SDQ Peer Problem scale (parent) | 0.994 | 1.440 | 1772 | 1.187 | 1.671 | 1633 | 12.985 | 3.18E-04 | 4.13E-04 | 0.004 |
| SDQ Emotion scale (parent) | 1.974 | 2.010 | 1773 | 1.582 | 1.867 | 1632 | 34.680 | 4.26E-09 | 6.82E-09 | 0.010 |
| SDQ Prosocial scale (child self-report) | 8.299 | 1.673 | 1774 | 7.428 | 1.924 | 1598 | 197.964 | 9.81E-44 | 1.18E-42 | 0.055 |
| SDQ Hyperactivity scale (child self-report) | 3.622 | 2.164 | 1771 | 4.194 | 2.357 | 1597 | 53.924 | 2.60E-13 | 5.67E-13 | 0.016 |
| SDQ Conduct scale (child self-report) | 2.032 | 1.783 | 1770 | 2.417 | 1.930 | 1596 | 36.202 | 1.97E-09 | 3.26E-09 | 0.011 |
| SDQ Peer Problem scale (child self-report) | 1.929 | 1.757 | 1769 | 2.008 | 1.788 | 1581 | 1.654 | 1.98E-01 | 2.17E-01 | 0.000 |
| SDQ Emotion scale (child self-report) | 3.515 | 2.422 | 1765 | 3.019 | 2.310 | 1596 | 36.653 | 1.57E-09 | 2.69E-09 | 0.011 |
| SDQ Prosocial scale (teacher) | 8.135 | 1.956 | 1503 | 6.833 | 2.466 | 1388 | 249.026 | 7.07E-54 | 1.16E-52 | 0.079 |
| SDQ Hyperactivity scale (teacher) | 1.963 | 2.013 | 1499 | 3.373 | 2.749 | 1381 | 249.283 | 6.40E-54 | 1.16E-52 | 0.080 |
| SDQ Conduct scale (teacher) | 0.349 | 0.927 | 1501 | 0.778 | 1.499 | 1383 | 86.889 | 2.21E-20 | 7.59E-20 | 0.029 |
| SDQ Peer Problem scale (teacher) | 0.751 | 1.285 | 1504 | 1.033 | 1.647 | 1391 | 26.441 | 2.90E-07 | 4.35E-07 | 0.009 |
| SDQ Emotion scale (teacher) | 1.435 | 1.862 | 1504 | 1.332 | 1.796 | 1389 | 2.280 | 1.31E-01 | 1.57E-01 | 0.001 |
| CAST Social scale at 9 (parent), 0-14 | 2.209 | 1.719 | 1774 | 2.745 | 1.961 | 1631 | 72.076 | 3.05E-17 | 7.70E-17 | 0.021 |
| CAST Non-Social scale at 9 (parent), 0-10 | 1.957 | 1.436 | 1772 | 2.376 | 1.697 | 1628 | 60.681 | 8.85E-15 | 2.12E-14 | 0.018 |
| CAST Communication scale at 9 (parent) | 2.173 | 1.880 | 1774 | 2.624 | 2.176 | 1629 | 41.981 | 1.05E-10 | 2.02E-10 | 0.012 |
| CAST Social scale at 9 (child self-report) | 4.157 | 2.315 | 1720 | 4.715 | 2.334 | 1534 | 46.764 | 9.53E-12 | 1.99E-11 | 0.014 |
| CAST Non-Social scale at 9 (child self-report) | 3.890 | 2.074 | 1727 | 4.047 | 2.130 | 1532 | 4.539 | 3.32E-02 | 4.19E-02 | 0.001 |
| CAST Communication scale at 9 (child self-report) | 3.257 | 2.577 | 1727 | 3.643 | 2.622 | 1531 | 17.948 | 2.33E-05 | 3.11E-05 | 0.005 |
| CAST Social scale at 9 (teacher) | 2.267 | 1.958 | 1504 | 3.003 | 2.396 | 1388 | 82.209 | 2.20E-19 | 6.61E-19 | 0.028 |
| CAST Non-Social scale at 9 (teacher) | 1.400 | 1.293 | 1502 | 1.891 | 1.690 | 1389 | 77.894 | 1.85E-18 | 4.92E-18 | 0.026 |
| CAST Communication scale at 9 (teacher) | 1.904 | 1.989 | 1505 | 2.808 | 2.633 | 1389 | 109.846 | 2.98E-25 | 1.19E-24 | 0.037 |
| APSD Narcissism scale (parent) | 1.739 | 1.968 | 1772 | 2.129 | 2.161 | 1632 | 30.441 | 3.70E-08 | 5.73E-08 | 0.009 |
| APSD Impulsivity scale (parent) | 2.963 | 1.969 | 1774 | 3.693 | 2.179 | 1635 | 105.480 | 2.17E-24 | 8.00E-24 | 0.030 |
| APSD Narcissism scale (teacher) | 0.936 | 1.858 | 1504 | 1.542 | 2.460 | 1388 | 56.480 | 7.53E-14 | 1.72E-13 | 0.019 |
| APSD Impulsivity scale (teacher) | 1.114 | 1.559 | 1505 | 2.234 | 2.225 | 1387 | 248.965 | 7.26E-54 | 1.16E-52 | 0.079 |

| **Age 16** |  |  |  |  |  |  |  |  |  |  |
| --- | --- | --- | --- | --- | --- | --- | --- | --- | --- | --- |
|  | male_mean | male_sd | male_n | female_mean | female_sd | female_n | F_value | p_value | p_fdr | r_squared |
| SDQ Hyperactivity scale (parent behaviour qnr at 16), 0-10 | 1.978 | 1.814 | 2799 | 2.718 | 2.138 | 2317 | 179.570 | 2.86E-40 | 2.11E-39 | 0.034 |
| SDQ Conduct scale (parent behaviour qnr at 16), 0-10 | 1.225 | 1.401 | 2805 | 1.295 | 1.424 | 2319 | 3.108 | 7.79E-02 | 1.12E-01 | 0.001 |
| SDQ Prosocial scale (parent behaviour qnr at 16), 0-10 | 8.484 | 1.828 | 2802 | 7.908 | 2.055 | 2318 | 112.261 | 5.81E-26 | 3.12E-25 | 0.021 |
| SDQ Emotion scale (child behaviour qnr at 16), 0-10 | 3.380 | 2.327 | 2795 | 1.948 | 1.850 | 2302 | 572.485 | 5.41E-120 | 3.19E-118 | 0.101 |
| SDQ Peer Problems scale (child behaviour qnr at 16), 0-10 | 1.507 | 1.487 | 2796 | 1.615 | 1.528 | 2302 | 6.455 | 1.11E-02 | 1.98E-02 | 0.001 |
| SDQ Hyperactivity scale (child behaviour qnr at 16), 0-10 | 3.554 | 2.314 | 2796 | 3.642 | 2.309 | 2302 | 1.841 | 1.75E-01 | 2.29E-01 | 0.000 |
| SDQ Conduct scale (child behaviour qnr at 16), 0-10 | 1.567 | 1.458 | 2795 | 1.772 | 1.500 | 2301 | 24.367 | 8.22E-07 | 2.20E-06 | 0.005 |
| SDQ Prosocial scale (child behaviour qnr at 16), 0-10 | 7.626 | 1.787 | 2795 | 6.521 | 1.942 | 2301 | 445.741 | 6.40E-95 | 1.89E-93 | 0.080 |
| MFQ total scale (child ) | 4.337 | 4.852 | 2797 | 2.653 | 3.509 | 2305 | 193.902 | 2.75E-43 | 3.25E-42 | 0.037 |
| MFQ total scale (parent) | 1.208 | 2.646 | 2803 | 0.786 | 1.910 | 2320 | 41.299 | 1.42E-10 | 4.20E-10 | 0.008 |
| ARBQ Anxiety total scale (parent) | 4.329 | 4.601 | 2805 | 2.875 | 3.739 | 2321 | 149.999 | 5.17E-34 | 3.05E-33 | 0.028 |
| Conners Impulsivity scale (parent) | 2.484 | 3.386 | 2801 | 2.890 | 3.886 | 2318 | 16.000 | 6.42E-05 | 1.58E-04 | 0.003 |
| Conners Inattention scale (parent) | 3.413 | 4.335 | 2801 | 5.400 | 5.487 | 2318 | 209.395 | 1.53E-46 | 2.25E-45 | 0.039 |
| Conners Emotional Lability scale (parent) | 1.485 | 1.994 | 2802 | 1.094 | 1.656 | 2319 | 56.779 | 5.73E-14 | 1.88E-13 | 0.011 |
| ICUT Callous scale (child ) | 4.783 | 3.268 | 680 | 6.145 | 3.768 | 446 | 41.339 | 1.89E-10 | 5.30E-10 | 0.035 |
| ICUT Callous scale (parent) | 4.319 | 3.481 | 2802 | 5.279 | 3.788 | 2319 | 89.012 | 5.80E-21 | 2.85E-20 | 0.017 |
| ICUT Unemotional scale (child) | 7.382 | 3.194 | 680 | 8.127 | 2.927 | 445 | 15.584 | 8.38E-05 | 1.98E-04 | 0.014 |
| ICUT Unemotional scale (parent) | 4.724 | 2.844 | 2804 | 5.811 | 2.940 | 2322 | 179.897 | 2.43E-40 | 2.05E-39 | 0.034 |
| ICUT Uncaring scale (child) | 5.728 | 3.523 | 680 | 7.806 | 3.713 | 445 | 89.657 | 1.61E-20 | 7.31E-20 | 0.074 |
| ICUT Uncaring scale (parent) | 6.872 | 4.602 | 2804 | 8.706 | 4.906 | 2322 | 189.903 | 1.89E-42 | 1.86E-41 | 0.036 |
| Autism Quotient Social scale (child) | 7.012 | 4.297 | 2797 | 6.924 | 3.997 | 2301 | 0.561 | 4.54E-01 | 5.05E-01 | 0.000 |
| Autism Quotient Social scale (parent) | 6.947 | 4.581 | 2803 | 7.844 | 4.915 | 2321 | 45.552 | 1.65E-11 | 5.13E-11 | 0.009 |
| Autism Quotient Attention Switching scale (parent) | 7.841 | 4.049 | 2800 | 8.908 | 4.395 | 2321 | 81.559 | 2.36E-19 | 9.30E-19 | 0.016 |
| Autism Quotient Imagination scale (parent) | 3.844 | 3.119 | 2796 | 5.004 | 3.536 | 2303 | 154.772 | 5.04E-35 | 3.31E-34 | 0.029 |
| Autism Quotient Attention to Detail scale (child) | 4.454 | 3.383 | 2796 | 5.367 | 3.641 | 2301 | 85.799 | 2.87E-20 | 1.21E-19 | 0.017 |
| Autism Quotient Attention to Detail scale (parent) | 4.011 | 3.602 | 2798 | 4.826 | 3.983 | 2308 | 58.716 | 2.17E-14 | 7.52E-14 | 0.011 |
| Subjective Happiness Scale overall mean score (child ) | 5.129 | 0.985 | 2790 | 5.115 | 0.917 | 2307 | 0.282 | 5.95E-01 | 6.27E-01 | 0.000 |
| CASI Anxiety total scale (child) | 9.489 | 6.293 | 2797 | 6.121 | 4.894 | 2304 | 440.696 | 6.49E-94 | 1.28E-92 | 0.080 |
| SWAN Inattention mean score (child ) | 4.705 | 0.877 | 681 | 4.665 | 0.886 | 449 | 0.537 | 4.64E-01 | 5.07E-01 | 0.000 |
| SWAN Hyperactivity mean score (child ) | 4.805 | 1.016 | 680 | 4.845 | 0.962 | 449 | 0.416 | 5.19E-01 | 5.57E-01 | 0.000 |
| School Engagement: Teacher-Student Relations | 2.894 | 0.724 | 1510 | 2.922 | 0.758 | 1114 | 0.908 | 3.41E-01 | 3.94E-01 | 0.000 |
| School Engagement: Control/Relevance of School Work | 2.882 | 0.663 | 1508 | 2.828 | 0.660 | 1113 | 4.191 | 4.07E-02 | 6.32E-02 | 0.002 |
| School Engagement: Peer Support for Learning | 2.910 | 0.764 | 1507 | 2.865 | 0.739 | 1111 | 2.303 | 1.29E-01 | 1.82E-01 | 0.001 |
| School Engagement: Future Aspirations/Goals | 3.294 | 0.936 | 1505 | 3.218 | 0.986 | 1112 | 4.052 | 4.42E-02 | 6.69E-02 | 0.002 |
| PISA Homework Behaviour scale (child) | 4.492 | 1.120 | 1518 | 4.430 | 1.130 | 1131 | 1.995 | 1.58E-01 | 2.17E-01 | 0.001 |
| PISA Homework Feedback scale (child) | 4.915 | 1.756 | 1509 | 5.059 | 1.787 | 1115 | 4.242 | 3.95E-02 | 6.31E-02 | 0.002 |
| PISA Attitudes to School overall mean score (child) | 3.241 | 0.579 | 1517 | 3.235 | 0.603 | 1132 | 0.074 | 7.85E-01 | 8.13E-01 | 0.000 |
| Life Satisfaction School mean score (child) | 4.309 | 1.033 | 1600 | 4.271 | 0.999 | 1198 | 0.958 | 3.28E-01 | 3.87E-01 | 0.000 |
| PISA Maths Interest overall | 2.416 | 0.963 | 1515 | 2.705 | 0.914 | 1117 | 60.713 | 9.43E-15 | 3.48E-14 | 0.023 |
| PISA Time Spent on Maths total | 4.429 | 1.646 | 1503 | 4.493 | 1.828 | 1099 | 0.853 | 3.56E-01 | 4.04E-01 | 0.000 |
| EWQB Classroom Environment, work in small groups | 1.176 | 0.705 | 1508 | 1.207 | 0.707 | 1113 | 1.176 | 2.78E-01 | 3.35E-01 | 0.000 |
| EWQB Classroom Environment, help each other | 1.948 | 0.786 | 1495 | 1.857 | 0.794 | 1107 | 8.363 | 3.86E-03 | 7.85E-03 | 0.003 |
| EWQB Classroom Environment, first to answe | 1.817 | 0.908 | 1502 | 1.918 | 0.863 | 1110 | 8.258 | 4.09E-03 | 8.04E-03 | 0.003 |
| EWQB Classroom Environment, first to finish | 1.810 | 0.959 | 1503 | 1.950 | 0.890 | 1111 | 14.500 | 1.43E-04 | 3.25E-04 | 0.006 |
| EWQB Classroom Environment, show each other work | 1.804 | 0.889 | 1502 | 1.894 | 0.908 | 1108 | 6.531 | 1.07E-02 | 1.96E-02 | 0.002 |
| EWQB Classroom Environment, tell each other reports | 1.997 | 0.822 | 1502 | 2.117 | 0.809 | 1108 | 13.916 | 1.95E-04 | 4.11E-04 | 0.005 |
| EWQB Classroom Environment, makes work interesting | 1.664 | 0.885 | 1503 | 1.820 | 0.866 | 1110 | 20.163 | 7.42E-06 | 1.90E-05 | 0.008 |
| EWQB Classroom Environment, teacher likes work | 1.947 | 0.786 | 1498 | 1.943 | 0.795 | 1108 | 0.017 | 8.95E-01 | 8.95E-01 | 0.000 |
| EWQB Classroom Environment, teacher explains why | 1.731 | 0.923 | 1497 | 1.796 | 0.883 | 1107 | 3.213 | 7.31E-02 | 1.08E-01 | 0.001 |
| EWQB Classroom Environment, wait a long time | 1.341 | 0.867 | 1500 | 1.262 | 0.796 | 1107 | 5.625 | 1.78E-02 | 3.00E-02 | 0.002 |
| EWQB Classroom Environment, shows an interest | 1.913 | 0.906 | 1502 | 2.000 | 0.834 | 1108 | 6.226 | 1.26E-02 | 2.19E-02 | 0.002 |
| EWQB Classroom Environment, express opinions | 1.798 | 0.882 | 1502 | 1.879 | 0.848 | 1104 | 5.454 | 1.96E-02 | 3.21E-02 | 0.002 |
| EWQB Classroom Environment, continues teaching | 2.176 | 0.885 | 1501 | 2.182 | 0.828 | 1107 | 0.037 | 8.47E-01 | 8.61E-01 | 0.000 |
| EWQB Classroom Environment, does a lot to help | 2.152 | 0.867 | 1503 | 2.238 | 0.796 | 1108 | 6.713 | 9.62E-03 | 1.83E-02 | 0.003 |
| EWQB Classroom Environment, checks homework | 2.164 | 0.855 | 1497 | 2.204 | 0.815 | 1104 | 1.457 | 2.27E-01 | 2.92E-01 | 0.001 |
| EWQB Classroom Environment, cannot work well | 0.726 | 0.699 | 1501 | 0.758 | 0.702 | 1105 | 1.400 | 2.37E-01 | 2.97E-01 | 0.001 |
| WQB Classroom Environment, do not listen | 0.905 | 0.742 | 1502 | 0.866 | 0.699 | 1107 | 1.864 | 1.72E-01 | 2.29E-01 | 0.001 |
| EWQB Classroom Environment, noise and disorder | 1.053 | 0.819 | 1496 | 1.018 | 0.767 | 1102 | 1.246 | 2.64E-01 | 3.25E-01 | 0.000 |
| EWQB Classroom Environment, doing nothing | 1.405 | 0.968 | 1500 | 1.263 | 0.935 | 1109 | 14.133 | 1.74E-04 | 3.80E-04 | 0.005 |

| **Age 21** |  |  |  |  |  |  |  |  |  |  |
| --- | --- | --- | --- | --- | --- | --- | --- | --- | --- | --- |
|  | male_mean | male_sd | male_n | female_mean | female_sd | female_n | F_value | p_value | p_fdr | r_squared |
|  |  |  |  |  |  |  |  |  |  |  |
| SDQ Emotion total score (parent) | 2.920 | 2.479 | 2936 | 1.814 | 1.983 | 2401 | 314.077 | 0.000 | 0.000 | 0.056 |
| SDQ Emotion total score (twin) | 4.110 | 2.711 | 2935 | 2.770 | 2.465 | 1789 | 290.222 | 0.000 | 0.000 | 0.058 |
| SDQ Conduct total score (parent) | 1.262 | 1.354 | 2939 | 1.225 | 1.280 | 2406 | 1.066 | 0.302 | 0.352 | 0.000 |
| SDQ Conduct total score (twin) | 1.521 | 1.304 | 2935 | 1.645 | 1.319 | 1789 | 9.834 | 0.002 | 0.002 | 0.002 |
| SDQ Hyperactivity total score (parent) | 1.745 | 1.906 | 2938 | 2.259 | 2.160 | 2400 | 85.244 | 0.000 | 0.000 | 0.016 |
| SDQ Hyperactivity total score (twin) | 3.227 | 2.171 | 2934 | 3.448 | 2.184 | 1789 | 11.465 | 0.001 | 0.001 | 0.002 |
| SDQ Peer problems total score (parent) | 1.445 | 1.728 | 2937 | 1.436 | 1.803 | 2404 | 0.033 | 0.856 | 0.856 | 0.000 |
| SDQ Peer problems total score (twin) | 2.174 | 1.846 | 2935 | 2.189 | 1.736 | 1789 | 0.076 | 0.783 | 0.822 | 0.000 |
| SDQ Prosocial total score (parent) | 8.338 | 1.874 | 2939 | 7.845 | 2.097 | 2408 | 82.231 | 0.000 | 0.000 | 0.015 |
| SDQ Prosocial total score (twin0 | 8.026 | 1.670 | 2936 | 7.016 | 2.025 | 1790 | 344.610 | 0.000 | 0.000 | 0.068 |
| MFQ overall total score (twin) | 4.826 | 4.284 | 2935 | 3.785 | 3.649 | 1787 | 73.249 | 0.000 | 0.000 | 0.015 |
| MFQ overall total score (twin) | 4.219 | 4.005 | 2684 | 3.055 | 3.359 | 1540 | 92.718 | 0.000 | 0.000 | 0.021 |
| Conners Impulsivity total score (parent) | 2.525 | 3.676 | 2935 | 2.656 | 3.967 | 2402 | 1.556 | 0.212 | 0.262 | 0.000 |
| Conners Inattention total score (parent) | 3.484 | 4.175 | 2936 | 4.845 | 5.222 | 2407 | 112.027 | 0.000 | 0.000 | 0.021 |
| General Anxiety overall total score (twin) | 8.112 | 7.690 | 2684 | 5.882 | 6.685 | 1538 | 90.289 | 0.000 | 0.000 | 0.021 |
| BAQ Physical Aggression mean score (twin) | 2.118 | 1.007 | 2859 | 2.680 | 1.087 | 1797 | 322.985 | 0.000 | 0.000 | 0.065 |
| BAQ Verbal Aggression mean score (twin) | 2.975 | 0.880 | 2859 | 3.182 | 0.815 | 1797 | 64.641 | 0.000 | 0.000 | 0.014 |
| BAQ Anger mean score (twin) | 2.065 | 1.089 | 2859 | 1.958 | 1.028 | 1797 | 11.033 | 0.001 | 0.001 | 0.002 |
| SANS overall total score (twin) | 3.047 | 4.165 | 2927 | 3.706 | 4.767 | 2402 | 29.004 | 0.000 | 0.000 | 0.005 |
| SPEQ Paranoia total score (twin) | 10.172 | 11.892 | 2711 | 9.524 | 10.592 | 1572 | 3.198 | 0.074 | 0.097 | 0.001 |
| SPEQ Hallucinations total score (twin) | 1.691 | 4.194 | 2711 | 1.786 | 4.121 | 1572 | 0.515 | 0.473 | 0.523 | 0.000 |

## Supplementary Table S3. Factor loadings and model fit statistics for confirmatory factor analyses (CFA) for the general factor of psychopathology.

| **Age 7** |  |  |  |  |
| --- | --- | --- | --- | --- |
|  | Estimate | Std.Err | z-value | P(>|z|) |
| P |  |  |  |  |
| SDQ hyperactivity (parent) | 0.393 | 0.013 | 31.013 | 0 |
| SDQ conduct total (parent) | 0.403 | 0.013 | 31.687 | 0 |
| SDQ hyperactivity total (teacher) | 0.622 | 0.013 | 46.861 | 0 |
| SDQ conduct total (teacher) | 0.629 | 0.013 | 47.296 | 0 |
| SDQ prosocial total (parent) | -0.273 | 0.013 | -21.517 | 0 |
| SDQ peer problem total (parent) | 0.441 | 0.012 | 35.671 | 0 |
| SDQ emotion total (parent) | 0.257 | 0.013 | 20.186 | 0 |
| SDQ prosocial total (teacher) | -0.672 | 0.013 | -52.565 | 0 |
| SDQ peer problem total (teacher) | 0.779 | 0.013 | 59.32 | 0 |
| SDQ emotion total (teacher) | 0.386 | 0.014 | 27.719 | 0 |
| Social (ASD) total (parent) | 0.471 | 0.013 | 37.584 | 0 |
| Non-Social (ASD) total (parent) | 0.194 | 0.013 | 15.21 | 0 |
| Social (ASD) total (teacher), | 0.904 | 0.012 | 72.502 | 0 |
| Non-Social (ASD) total (teacher) | 0.094 | 0.014 | 6.514 | 0 |
|  |  |  |  |  |
| **Model fit:** |  |  |  |  |
| AIC | 259481.871 |  |  |  |
| BIC | 259774.799 |  |  |  |
| CFI | 0.53 |  |  |  |
| RMSA | 0.151 (0.149-0.153) | |  |  |
| SRMR | 0.114 |  |  |  |

| **Age 9** |  |  |  |  |
| --- | --- | --- | --- | --- |
|  | Estimate | Std.Err | z-value | P(>|z|) |
| P |  |  |  |  |
| SDQ Hyperactivity scale (parent) | 0.639 | 0.017 | 38.082 | 0 |
| SDQ Conduct scale (parent) | 0.619 | 0.017 | 36.544 | 0 |
| SDQ Peer Problem scale (parent) | 0.528 | 0.017 | 30.306 | 0 |
| SDQ Prosocial scale (parent) | -0.314 | 0.018 | -17.219 | 0 |
| SDQ Emotion scale (parent) | 0.394 | 0.018 | 21.745 | 0 |
| SDQ Prosocial scale (teacher) | -0.202 | 0.019 | -10.861 | 0 |
| SDQ Hyperactivity scale (child self-report) | 0.464 | 0.018 | 25.97 | 0 |
| SDQ Conduct scale (child self-report) | 0.514 | 0.018 | 29.238 | 0 |
| SDQ Peer Problem scale (child self-report) | 0.456 | 0.018 | 25.413 | 0 |
| SDQ Emotion scale (child self-report) | 0.377 | 0.018 | 20.602 | 0 |
| SDQ Prosocial scale (teacher) | -0.548 | 0.019 | -28.754 | 0 |
| SDQ Hyperactivity scale (teacher) | 0.691 | 0.018 | 38.495 | 0 |
| SDQ Conduct scale (teacher) | 0.647 | 0.018 | 35.077 | 0 |
| SDQ Peer Problem scale (teacher) | 0.544 | 0.019 | 28.77 | 0 |
| SDQ Emotion scale (teacher) | 0.324 | 0.02 | 16.327 | 0 |
| CAST Social scale at 9 (parent), 0-14 | 0.379 | 0.018 | 20.995 | 0 |
| CAST Non-Social scale at 9 (parent), 0-10 | 0.317 | 0.018 | 17.307 | 0 |
| CAST Communication scale at 9 (parent) | 0.565 | 0.017 | 32.798 | 0 |
| CAST Social scale at 9 (child self-report) | 0.281 | 0.019 | 14.845 | 0 |
| CAST Non-Social scale at 9 (child self-report) | 0.297 | 0.019 | 15.668 | 0 |
| CAST Communication scale at 9 (child self-report) | 0.446 | 0.018 | 24.179 | 0 |
| CAST Social scale at 9 (teacher) | 0.473 | 0.019 | 24.506 | 0 |
| CAST Non-Social scale at 9 (teacher) | 0.25 | 0.02 | 12.444 | 0 |
| CAST Communication scale at 9 (teacher) | 0.631 | 0.018 | 34.277 | 0 |
| APSD Narcissism scale (parent) | 0.544 | 0.017 | 31.125 | 0 |
| APSD Impulsivity scale (parent) | 0.662 | 0.017 | 39.636 | 0 |
| APSD Narcissism scale (teacher) | 0.585 | 0.019 | 30.896 | 0 |
| APSD Impulsivity scale (teacher) | 0.662 | 0.018 | 36.074 | 0 |
|  |  |  |  |  |
| **Model fit:** |  |  |  |  |
| AIC | 237885.337 |  |  |  |
| BIC | 238410.957 |  |  |  |
| CFI | 0.525 |  |  |  |
| RMSA | 0.105 (0.103-0.106) | |  |  |
| SRMR | 0.106 |  |  |  |

| **Age 16** |  |  |  |  |
| --- | --- | --- | --- | --- |
|  | Estimate | Std.Err | z-value | P(>|z|) |
| P |  |  |  |  |
| SDQ Hyperactivity scale (parent behaviour qnr at 16), 0-10 | 0.688 | 0.013 | 53.309 | 0 |
| SDQ Conduct scale (parent behaviour qnr at 16), 0-10 | 0.674 | 0.013 | 51.928 | 0 |
| SDQ Prosocial scale (parent behaviour qnr at 16), 0-10 | -0.55 | 0.014 | -40.049 | 0 |
| SDQ Emotion scale (child behaviour qnr at 16), 0-10 | 0.436 | 0.023 | 18.816 | 0 |
| SDQ Peer Problems scale (child behaviour qnr at 16), 0-10 | 0.388 | 0.023 | 16.659 | 0 |
| SDQ Hyperactivity scale (child behaviour qnr at 16), 0-10 | 0.52 | 0.022 | 23.517 | 0 |
| SDQ Conduct scale (child behaviour qnr at 16), 0-10 | 0.527 | 0.022 | 23.93 | 0 |
| SDQ Prosocial scale (child behaviour qnr at 16), 0-10 | -0.302 | 0.024 | -12.835 | 0 |
| MFQ total scale (child) | 0.493 | 0.023 | 21.793 | 0 |
| MFQ total scale (parent) | 0.543 | 0.014 | 39.679 | 0 |
| ARBQ Anxiety total scale (parent) | 0.507 | 0.014 | 36.287 | 0 |
| Conners Impulsivity scale (parent) | 0.528 | 0.014 | 38.203 | 0 |
| Conners Inattention scale (parent) | 0.717 | 0.013 | 56.363 | 0 |
| Conners Emotional Lability scale (parent) | 0.639 | 0.013 | 48.354 | 0 |
| ICUT Callous scale (child) | 0.421 | 0.037 | 11.362 | 0 |
| ICUT Callous scale (parent) | 0.554 | 0.014 | 40.555 | 0 |
| ICUT Unemotional scale (child) | 0.263 | 0.039 | 6.822 | 0 |
| ICUT Unemotional scale (parent) | 0.346 | 0.014 | 23.852 | 0 |
| ICUT Uncaring scale (child) | 0.446 | 0.037 | 12.089 | 0 |
| ICUT Uncaring scale (parent) | 0.661 | 0.013 | 50.205 | 0 |
| Autism Quotient Social scale (child) | 0.297 | 0.024 | 12.45 | 0 |
| Autism Quotient Social scale (parent) | 0.415 | 0.014 | 28.831 | 0 |
| Autism Quotient Attention Switching scale (parent) | 0.575 | 0.014 | 42.317 | 0 |
| Autism Quotient Imagination scale (parent) | 0.44 | 0.014 | 31.193 | 0 |
| Autism Quotient Attention to Detail scale (child) | 0.084 | 0.024 | 3.484 | 0 |
| Autism Quotient Attention to Detail scale (parent) | 0.058 | 0.015 | 3.898 | 0 |
| Subjective Happiness Scale overall mean score (child) | -0.429 | 0.023 | -18.657 | 0 |
| CASI Anxiety total scale (child) | 0.29 | 0.024 | 12.234 | 0 |
| SWAN Inattention mean score (child) | -0.525 | 0.036 | -14.742 | 0 |
| SWAN Hyperactivity mean score (child) | -0.448 | 0.037 | -12.217 | 0 |
|  |  |  |  |  |
| **Model fit:** |  |  |  |  |
| AIC | 269349.268 |  |  |  |
| BIC | 269938.371 |  |  |  |
| CFI | 0.455 |  |  |  |
| RMSA | 0.092 (0.091-0.093) | |  |  |
| SRMR | 0.114 |  |  |  |

| **Age 21** |  |  |  |  |
| --- | --- | --- | --- | --- |
|  |  |  |  |  |
| P | Estimate | Std.Err | z-value | P(>|z|) |
| SDQ Emotion total score (parent) | 0.558 | 0.014 | 40.288 | 0 |
| SDQ Emotion total score (twin) | 0.753 | 0.014 | 53.728 | 0 |
| SDQ Conduct total score (parent) | 0.46 | 0.014 | 31.998 | 0 |
| SDQ Conduct total score (twin) | 0.427 | 0.016 | 27.444 | 0 |
| SDQ Hyperactivity total score (parent) | 0.489 | 0.014 | 34.123 | 0 |
| SDQ Hyperactivity total score (twin) | 0.656 | 0.014 | 45.501 | 0 |
| SDQ Peer problems total score (parent) | 0.44 | 0.014 | 30.385 | 0 |
| SDQ Peer problems total score (twin) | 0.549 | 0.015 | 36.711 | 0 |
| SDQ Prosocial total score (parent) | 0.262 | 0.015 | 17.537 | 0 |
| SDQ Prosocial total score (twin) | -0.219 | 0.016 | -13.615 | 0 |
| MFQ overall total score (twin) | 0.781 | 0.014 | 56.429 | 0 |
| MFQ overall total score (twin) | 0.747 | 0.015 | 50.164 | 0 |
| Conners Impulsivity total score (parent) | 0.403 | 0.015 | 27.553 | 0 |
| Conners Inattention total score (parent) | 0.527 | 0.014 | 37.343 | 0 |
| General Anxiety overall total score (twin) | 0.67 | 0.016 | 43.129 | 0 |
| BAQ Physical Aggression mean score (twin) | 0.325 | 0.016 | 20.063 | 0 |
| BAQ Verbal Aggression mean score (twin) | 0.174 | 0.017 | 10.51 | 0 |
| BAQ Anger mean score (twin) | 0.487 | 0.016 | 31.227 | 0 |
| SANS overall total score (twin) | 0.502 | 0.017 | 30.211 | 0 |
| SPEQ Paranoia total score (twin) | 0.609 | 0.016 | 38.915 | 0 |
| SPEQ Hallucinations total score (twin) | 0.472 | 0.016 | 28.928 | 0 |
|  |  |  |  |  |
| **Model fit:** |  |  |  |  |
| AIC | 265092.236 |  |  |  |
| BIC | 265517.139 |  |  |  |
| CFI | 0.581 |  |  |  |
| RMSA | 0.108 (0.106-0.109) | |  |  |
| SRMR | 0.109 |  |  |  |

## Supplementary Table S4. Factor loadings and model fit statistics for confirmatory factor analyses (CFA) for the internalising factor of psychopathology.

| **Age 7** |  |  |  |  |
| --- | --- | --- | --- | --- |
|  | Estimate | Std.Err | z-value | P(>|z|) |
| Int |  |  |  |  |
| SDQ peer problem total (parent) | 0.369 | 0.013 | 27.953 | 0 |
| SDQ emotion total (parent) | 0.194 | 0.013 | 14.676 | 0 |
| SDQ prosocial total (teacher) | -0.63 | 0.012 | -50.775 | 0 |
| SDQ peer problem total (teacher) | 0.827 | 0.012 | 70.658 | 0 |
| SDQ emotion total (teacher) | 0.399 | 0.013 | 29.989 | 0 |
| Social (ASD) total (parent) | 0.352 | 0.013 | 26.952 | 0 |
| Non-Social (ASD) total (parent) | 0.159 | 0.013 | 12.056 | 0 |
| Social (ASD) total (teacher), | 0.984 | 0.011 | 88.39 | 0 |
| Non-Social (ASD) total (teacher) | 0.135 | 0.014 | 9.767 | 0 |
| SDQ prosocial total (parent) | -0.206 | 0.013 | -15.938 | 0 |
|  |  |  |  |  |
| **Model fit:** |  |  |  |  |
| AIC | 185987.05 |  |  |  |
| BIC | 186196.285 |  |  |  |
| CFI | 0.582 |  |  |  |
| RMSA | 0.173 (0.170-0.176) | |  |  |
| SRMR | 0.12 |  |  |  |

| **Age 9** |  |  |  |  |
| --- | --- | --- | --- | --- |
|  | Estimate | Std.Err | z-value | P(>|z|) |
| Int |  |  |  |  |
| SDQ Peer Problem scale (parent) | 0.654 | 0.018 | 37.261 | 0 |
| SDQ Prosocial scale (parent) | -0.256 | 0.019 | -13.342 | 0 |
| SDQ Emotion scale (parent) | 0.427 | 0.019 | 22.786 | 0 |
| SDQ Prosocial scale (child self-report) | -0.162 | 0.02 | -8.302 | 0 |
| SDQ Peer Problem scale (child self-report) | 0.566 | 0.018 | 30.93 | 0 |
| SDQ Emotion scale (child self-report) | 0.439 | 0.019 | 22.97 | 0 |
| SDQ Prosocial scale (teacher) | -0.446 | 0.021 | -21.4 | 0 |
| SDQ Peer Problem scale (teacher) | 0.643 | 0.02 | 32.676 | 0 |
| SDQ Emotion scale (teacher) | 0.417 | 0.02 | 20.351 | 0 |
| CAST Social scale at 9 (parent), 0-14 | 0.479 | 0.019 | 25.844 | 0 |
| CAST Non-Social scale at 9 (parent), 0-10 | 0.396 | 0.019 | 21.067 | 0 |
| CAST Communication scale at 9 (parent) | 0.53 | 0.018 | 29.131 | 0 |
| CAST Social scale at 9 (child self-report) | 0.336 | 0.019 | 17.256 | 0 |
| CAST Non-Social scale at 9 (child self-report) | 0.361 | 0.02 | 18.271 | 0 |
| CAST Communication scale at 9 (child self-report) | 0.435 | 0.02 | 22.291 | 0 |
| CAST Social scale at 9 (teacher) | 0.563 | 0.02 | 27.872 | 0 |
| CAST Non-Social scale at 9 (teacher) | 0.348 | 0.021 | 16.728 | 0 |
| CAST Communication scale at 9 (teacher) | 0.62 | 0.02 | 31.327 | 0 |
|  |  |  |  |  |
| **Model fit:** |  |  |  |  |
| AIC | 156198.206 |  |  |  |
| BIC | 156536.105 |  |  |  |
| CFI | 0.566 |  |  |  |
| RMSA | 0.105 (0.102-0.107) | |  |  |
| SRMR | 0.096 |  |  |  |

| **Age 16** |  |  |  |  |
| --- | --- | --- | --- | --- |
|  | Estimate | Std.Err | z-value | P(>|z|) |
| Int |  |  |  |  |
| SDQ Prosocial scale (parent behaviour qnr at 16), 0-10 | 0.394 | 0.015 | 26.275 | 0 |
| SDQ Emotion scale (child behaviour qnr at 16), 0-10 | -0.671 | 0.022 | -29.924 | 0 |
| SDQ Peer Problems scale (child behaviour qnr at 16), 0-10 | -0.611 | 0.022 | -27.4 | 0 |
| SDQ Prosocial scale (child behaviour qnr at 16), 0-10 | 0.265 | 0.024 | 10.864 | 0 |
| MFQ total scale (child) | -0.6 | 0.023 | -25.769 | 0 |
| MFQ total scale (parent) | -0.518 | 0.015 | -35.48 | 0 |
| ARBQ Anxiety total scale (parent) | -0.662 | 0.014 | -48.178 | 0 |
| Autism Quotient Social scale (child) | -0.671 | 0.022 | -31.082 | 0 |
| Autism Quotient Social scale (parent) | -0.678 | 0.014 | -49.193 | 0 |
| Autism Quotient Attention Switching scale (parent) | -0.694 | 0.014 | -51.157 | 0 |
| Autism Quotient Imagination scale (parent) | -0.426 | 0.015 | -28.575 | 0 |
| Autism Quotient Attention to Detail scale (child) | -0.185 | 0.025 | -7.534 | 0 |
| Autism Quotient Attention to Detail scale (parent) | -0.168 | 0.015 | -10.89 | 0 |
| Subjective Happiness Scale overall mean score (child) | 0.6 | 0.023 | 26.443 | 0 |
| CASI Anxiety total scale (child) | -0.446 | 0.024 | -18.69 | 0 |
|  |  |  |  |  |
| **Model fit:** |  |  |  |  |
| AIC | 140765.401 |  |  |  |
| BIC | 141059.953 |  |  |  |
| CFI | 0.684 |  |  |  |
| RMSA | 0.098 (0.096-0.100) | |  |  |
| SRMR | 0.099 |  |  |  |

| **Age 21** |  |  |  |  |
| --- | --- | --- | --- | --- |
| Int | Estimate | Std.Err | z-value | P(>|z|) |
| SDQ Emotion total score (parent) | 0.536 | 0.015 | 36.935 | 0 |
| SDQ Emotion total score (twin) | 0.799 | 0.013 | 61.316 | 0 |
| SDQ Peer problems total score (parent) | 0.409 | 0.015 | 26.822 | 0 |
| SDQ Peer problems total score (twin) | 0.537 | 0.015 | 36.683 | 0 |
| SDQ Prosocial total score (parent) | 0.174 | 0.016 | 10.906 | 0 |
| SDQ Prosocial total score (twin) | -0.158 | 0.016 | -10.009 | 0 |
| MFQ overall total score (twin) | 0.798 | 0.013 | 61.246 | 0 |
| MFQ overall total score (twin) | 0.779 | 0.014 | 55.693 | 0 |
| General Anxiety overall total score (twin) | 0.724 | 0.014 | 49.978 | 0 |
| SANS overall total score (twin) | 0.393 | 0.017 | 23.695 | 0 |
| SPEQ Paranoia total score (twin) | 0.607 | 0.015 | 40.12 | 0 |
| SPEQ Hallucinations total score (twin) | 0.451 | 0.016 | 28.27 | 0 |
|  |  |  |  |  |
| **Model fit:** |  |  |  |  |
| AIC | 144351.4 |  |  |  |
| BIC | 144593.78 |  |  |  |
| CFI | 0.706 |  |  |  |
| RMSA | 0.122 (0.119-0.125) | |  |  |
| SRMR | 0.151 |  |  |  |

## Supplementary Table S5. Factor loadings and model fit statistics for confirmatory factor analyses (CFA) for the externalising factor of psychopathology.

| **Age 7** |  |  |  |  |
| --- | --- | --- | --- | --- |
| Ext | Estimate | Std.Err | z-value | P(>|z|) |
| SDQ hyperactivity (parent) | 0.53 | 0.013 | 39.725 | 0.00 |
| SDQ conduct total (parent) | 0.456 | 0.014 | 32.848 | 0.00 |
| SDQ hyperactivity total (teacher) | 0.799 | 0.014 | 57.271 | 0.00 |
| SDQ conduct total (teacher) | 0.698 | 0.013 | 51.842 | 0.00 |
|  |  |  |  |  |
| **Model fit:** |  |  |  |  |
| AIC | 74194.02 |  |  |  |
| BIC | 74277.713 |  |  |  |
| CFI | 0.858 |  |  |  |
| RMSA | 0.218 (0.205-0.231) | |  |  |
| SRMR | 0.061 |  |  |  |

| **Age 9** |  |  |  |  |
| --- | --- | --- | --- | --- |
|  |  |  |  |  |
| Ext | Estimate | Std.Err | z-value | P(>|z|) |
| SDQ Hyperactivity scale (parent) | 0.658 | 0.018 | 37.301 | 0 |
| SDQ Conduct scale (parent) | 0.627 | 0.018 | 34.748 | 0 |
| SDQ Hyperactivity scale (child self-report) | 0.465 | 0.018 | 25.305 | 0 |
| SDQ Conduct scale (child self-report) | 0.499 | 0.018 | 27.383 | 0 |
| SDQ Hyperactivity scale (teacher) | 0.744 | 0.019 | 39.765 | 0 |
| SDQ Conduct scale (teacher) | 0.69 | 0.02 | 35.288 | 0 |
| APSD Narcissism scale (parent) | 0.546 | 0.019 | 29.203 | 0 |
| APSD Impulsivity scale (parent) | 0.671 | 0.018 | 37.251 | 0 |
| APSD Narcissism scale (teacher) | 0.641 | 0.02 | 32.159 | 0 |
| APSD Impulsivity scale (teacher) | 0.739 | 0.019 | 38.001 | 0 |
|  |  |  |  |  |
| **Model fit:** |  |  |  |  |
| AIC | 82044.177 |  |  |  |
| BIC | 82231.891 |  |  |  |
| CFI | 0.608 |  |  |  |
| RMSA | 0.184 (0.179-0.188) | |  |  |
| SRMR | 0.124 |  |  |  |

| **Age 16** |  |  |  |  |
| --- | --- | --- | --- | --- |
| Ext | Estimate | Std.Err | z-value | P(>|z|) |
| SDQ Hyperactivity scale (parent behaviour qnr at 16), 0-10 | 0.688 | 0.013 | 53.309 | 0 |
| SDQ Conduct scale (parent behaviour qnr at 16), 0-10 | 0.674 | 0.013 | 51.928 | 0 |
| SDQ Prosocial scale (parent behaviour qnr at 16), 0-10 | -0.55 | 0.014 | -40.049 | 0 |
| SDQ Emotion scale (child behaviour qnr at 16), 0-10 | 0.436 | 0.023 | 18.816 | 0 |
| SDQ Peer Problems scale (child behaviour qnr at 16), 0-10 | 0.388 | 0.023 | 16.659 | 0 |
| SDQ Hyperactivity scale (child behaviour qnr at 16), 0-10 | 0.52 | 0.022 | 23.517 | 0 |
| SDQ Conduct scale (child behaviour qnr at 16), 0-10 | 0.527 | 0.022 | 23.93 | 0 |
| SDQ Prosocial scale (child behaviour qnr at 16), 0-10 | -0.302 | 0.024 | -12.835 | 0 |
| MFQ total scale (child) | 0.493 | 0.023 | 21.793 | 0 |
| MFQ total scale (parent) | 0.543 | 0.014 | 39.679 | 0 |
| ARBQ Anxiety total scale (parent) | 0.507 | 0.014 | 36.287 | 0 |
| Conners Impulsivity scale (parent) | 0.528 | 0.014 | 38.203 | 0 |
| Conners Inattention scale (parent) | 0.717 | 0.013 | 56.363 | 0 |
| Conners Emotional Lability scale (parent) | 0.639 | 0.013 | 48.354 | 0 |
| ICUT Callous scale (child) | 0.421 | 0.037 | 11.362 | 0 |
| ICUT Callous scale (parent) | 0.554 | 0.014 | 40.555 | 0 |
| ICUT Unemotional scale (child) | 0.263 | 0.039 | 6.822 | 0 |
| ICUT Unemotional scale (parent) | 0.346 | 0.014 | 23.852 | 0 |
| ICUT Uncaring scale (child) | 0.446 | 0.037 | 12.089 | 0 |
| ICUT Uncaring scale (parent) | 0.661 | 0.013 | 50.205 | 0 |
| Autism Quotient Social scale (child) | 0.297 | 0.024 | 12.45 | 0 |
| Autism Quotient Social scale (parent) | 0.415 | 0.014 | 28.831 | 0 |
| Autism Quotient Attention Switching scale (parent) | 0.575 | 0.014 | 42.317 | 0 |
| Autism Quotient Imagination scale (parent) | 0.44 | 0.014 | 31.193 | 0 |
| Autism Quotient Attention to Detail scale (child) | 0.084 | 0.024 | 3.484 | 0 |
| Autism Quotient Attention to Detail scale (parent) | 0.058 | 0.015 | 3.898 | 0 |
| Subjective Happiness Scale overall mean score (child ) | -0.429 | 0.023 | -18.657 | 0 |
| CASI Anxiety total scale (child) | 0.29 | 0.024 | 12.234 | 0 |
| SWAN Inattention mean score (child ) | -0.525 | 0.036 | -14.742 | 0 |
| SWAN Hyperactivity mean score (child ) | -0.448 | 0.037 | -12.217 | 0 |
|  |  |  |  |  |
|  |  |  |  |  |
| **Model fit:** |  |  |  |  |
| AIC | 269349.268 |  |  |  |
| BIC | 269938.371 |  |  |  |
| CFI | 0.455 |  |  |  |
| RMSA | 0.092 (0.091-0.093) | |  |  |
| SRMR | 0.114 |  |  |  |

| **Age 21** |  |  |  |  |
| --- | --- | --- | --- | --- |
|  |  |  |  |  |
| Ext | Estimate | Std.Err | z-value | P(>|z|) |
| SDQ Conduct total score (parent) | 0.613 | 0.014 | 42.949 | 0 |
| SDQ Conduct total score (twin) | 0.486 | 0.017 | 29.249 | 0 |
| SDQ Hyperactivity total score (parent) | 0.726 | 0.014 | 50.828 | 0 |
| SDQ Hyperactivity total score (twin) | 0.47 | 0.016 | 28.945 | 0 |
| Conners Impulsivity total score (parent) | 0.625 | 0.014 | 43.483 | 0 |
| Conners Inattention total score (parent) | 0.664 | 0.014 | 45.901 | 0 |
| BAQ Physical Aggression mean score (twin) | 0.446 | 0.017 | 26.271 | 0 |
| BAQ Verbal Aggression mean score (twin) | 0.386 | 0.017 | 22.544 | 0 |
| BAQ Anger mean score (twin) | 0.532 | 0.017 | 31.438 | 0 |
|  |  |  |  |  |
| **Model fit:** |  |  |  |  |
| AIC | 119356.884 |  |  |  |
| BIC | 119538.912 |  |  |  |
| CFI | 0.754 |  |  |  |
| RMSA | 0.122 (0.118-0.126) | |  |  |
| SRMR | 0.096 |  |  |  |

## Supplementary Table S6. Factor loadings and model fit statistics for confirmatory factor analyses (CFA) for the self-reported internalising factor of psychopathology.

| **Age 9** |  |  |  | |  | |
| --- | --- | --- | --- | --- | --- | --- |
|  | Estimate | Std.Err | z-value | | P(>|z|) | |
| Int |  |  |  | |  | |
| SDQ Prosocial scale (child self-report) | -0.089 | 0.02 | -4.353 | | 0 | |
| SDQ Peer Problem scale (child self-report) | 0.57 | 0.02 | 29.026 | | 0 | |
| SDQ Emotion scale (child self-report) | 0.587 | 0.019 | 30.883 | | 0 | |
| CAST Social scale at 9 (child self-report) | 0.286 | 0.02 | 13.99 | | 0 | |
| CAST Non-Social scale at 9 (child self-report) | 0.615 | 0.019 | 32.513 | | 0 | |
| CAST Communication scale at 9 (child self-report) | 0.743 | 0.019 | 38.814 | | 0 | |
|  |  |  |  | |  | |
| **Model fit:** |  |  |  | |  | |
| AIC | 53769.074 |  |  | |  | |
| BIC | 53879.373 |  |  | |  | |
| CFI | 0.684 |  |  | |  | |
| RMSA | 0.147 (0.141-0.160) | | |  | |  | |
| SRMR | 0.073 |  |  | |  | |
|  |  |  |  | |  | |
|  |  |  |  | |  | |
|  |  |  |  | |  | |
| **Age 16** |  |  |  | |  | |
|  | Estimate | Std.Err | z-value | | P(>|z|) | |
| Int |  |  |  | |  | |
| SDQ Emotion scale (child behaviour qnr at 16), 0-10 | 0.807 | 0.02 | 41.022 | | 0 | |
| SDQ Peer Problems scale (child behaviour qnr at 16), 0-10 | 0.552 | 0.022 | 24.936 | | 0 | |
| SDQ Prosocial scale (child behaviour qnr at 16), 0-10 | -0.156 | 0.024 | -6.493 | | 0 | |
| MFQ total scale (child) | 0.765 | 0.02 | 38.451 | | 0 | |
| Autism Quotient Social scale (child) | 0.546 | 0.022 | 24.587 | | 0 | |
| Autism Quotient Attention to Detail scale (child) | 0.194 | 0.023 | 8.305 | | 0 | |
| Subjective Happiness Scale overall mean score (child) | -0.638 | 0.021 | -30.162 | | 0 | |
| CASI Anxiety total scale (child) | 0.545 | 0.022 | 25.011 | | 0 | |
|  |  |  |  | |  | |
| **Model fit:** |  |  |  | |  | |
| AIC | 44969.091 |  |  | |  | |
| BIC | 45105.215 |  |  | |  | |
| CFI | 0.788 |  |  | |  | |
| RMSA | 0.153 (0.145-0.161) | | |  | |  | |
| SRMR | 0.078 |  |  | |  | |
|  |  |  |  | |  | |
|  |  |  |  | |  | |
| **Age 21** |  |  |  | |  | |
| Int | Estimate | Std.Err | z-value | | P(>|z|) | |
| SDQ Emotion total score (twin) | 0.790 | 0.013 | 60.771 | | 0 | |
| SDQ Peer problems total score (twin) | 0.508 | 0.015 | 34.727 | | 0 | |
| SDQ Prosocial total score (twin) | -0.137 | 0.016 | -8.758 | | 0 | |
| MFQ overall total score (twin) | 0.807 | 0.013 | 62.609 | | 0 | |
| MFQ overall total score (twin) | 0.79 | 0.014 | 57.18 | | 0 | |
| General Anxiety overall total score (twin ) | 0.732 | 0.014 | 50.998 | | 0 | |
| SANS overall total score (twin) | 0.296 | 0.017 | 17.693 | | 0 | |
| SPEQ Paranoia total score (twin) | 0.609 | 0.015 | 40.618 | | 0 | |
| SPEQ Hallucinations total score (twin) | 0.451 | 0.016 | 28.467 | | 0 | |
|  |  |  |  | |  | |
| **Model fit:** |  |  |  | |  | |
| AIC | 100522.938 |  |  | |  | |
| BIC | 100729.031 |  |  | |  | |
| CFI | 0.864 |  |  | |  | |
| RMSA | 0.122 (0.119-0.125) | | |  | |  | |
| SRMR | 0.059 |  |  | |  | |

## Supplementary Table S7. Contemporaneous correlations between educational experiences and mental health (p-factor) at ages 7, 9 and 16.

| **Age 7** | **r** | **95% CI** | | p | n | p_fdr |
| --- | --- | --- | --- | --- | --- | --- |
| Feelings about going to school (parent) | 0.034 | 0.004 | 0.064 | 2.72E-02 | 4181 | 2.72E-02 |
| Time off school | -0.226 | -0.247 | -0.205 | 1.12E-89 | 7700 | 2.23E-89 |
| **Age 9** |  |  |  |  |  |  |
| Peer_parent | -0.369 | -0.398 | -0.339 | 3.39E-109 | 3374 | 1.13E-108 |
| Peer_teacher | -0.393 | -0.424 | -0.362 | 3.04E-107 | 2882 | 7.60E-107 |
| Peer_self | -0.204 | -0.237 | -0.171 | 1.72E-32 | 3305 | 2.46E-32 |
| Classroom_parent | -0.400 | -0.428 | -0.372 | 7.91E-131 | 3395 | 5.27E-130 |
| Classroom_teacher | -0.480 | -0.508 | -0.451 | 8.22E-166 | 2880 | 8.22E-165 |
| Classroom_self | -0.228 | -0.260 | -0.196 | 1.68E-40 | 3314 | 2.58E-40 |
| Teach_parent | -0.274 | -0.305 | -0.243 | 1.12E-59 | 3392 | 2.04E-59 |
| Teach_self | -0.183 | -0.215 | -0.150 | 3.00E-26 | 3311 | 4.00E-26 |
| NegAffect_parent | 0.367 | 0.337 | 0.395 | 2.00E-108 | 3392 | 5.72E-108 |
| NegAffect_self | 0.377 | 0.347 | 0.405 | 5.14E-112 | 3311 | 2.57E-111 |
| Aventure_parent | -0.319 | -0.349 | -0.288 | 3.50E-81 | 3395 | 6.99E-81 |
| Aventure_self | -0.113 | -0.146 | -0.079 | 7.69E-11 | 3313 | 9.05E-11 |
| Opportunity_parent | -0.267 | -0.298 | -0.236 | 1.68E-56 | 3390 | 2.79E-56 |
| Opportunity_self | -0.140 | -0.173 | -0.106 | 6.72E-16 | 3313 | 8.40E-16 |
| Acceptance_parent | -0.463 | -0.489 | -0.436 | 3.17E-180 | 3394 | 6.34E-179 |
| Acceptance_self | -0.339 | -0.368 | -0.308 | 1.12E-89 | 3315 | 2.48E-89 |
| Classsize | -0.038 | -0.074 | -0.002 | 4.10E-02 | 2891 | 4.55E-02 |
| HW_night_teacher | -0.025 | -0.061 | 0.012 | 1.89E-01 | 2868 | 1.99E-01 |
| HW_finish_teacher | -0.401 | -0.431 | -0.370 | 7.60E-111 | 2860 | 3.04E-110 |
| HW_others_teacher | 0.021 | -0.016 | 0.058 | 2.61E-01 | 2813 | 2.61E-01 |
| **Age 16** |  |  |  |  |  |  |
| Student_teacher_relationship | -0.159 | -0.201 | -0.117 | 5.27E-13 | 2029 | 1.05E-12 |
| Relevance of school work | -0.181 | -0.222 | -0.138 | 2.62E-16 | 2027 | 8.11E-16 |
| Peer_support | -0.182 | -0.224 | -0.140 | 1.37E-16 | 2026 | 4.67E-16 |
| Homework_behaviour | -0.308 | -0.347 | -0.269 | 2.40E-46 | 2046 | 4.09E-45 |
| HW_feedback | -0.132 | -0.174 | -0.089 | 2.60E-09 | 2027 | 3.85E-09 |
| Homework | -0.250 | -0.290 | -0.209 | 3.26E-30 | 2027 | 2.77E-29 |
| Attitudes to school | -0.295 | -0.334 | -0.255 | 2.08E-42 | 2046 | 2.36E-41 |
| Satisfaction with school | -0.382 | -0.418 | -0.345 | 3.43E-74 | 2110 | 1.17E-72 |
| Classroom environment | -0.024 | -0.067 | 0.020 | 2.83E-01 | 2026 | 3.10E-01 |
| Classroom_help_peers | -0.136 | -0.178 | -0.092 | 9.99E-10 | 2016 | 1.54E-09 |
| Classroom_first_answer | 0.015 | -0.029 | 0.058 | 5.06E-01 | 2018 | 5.06E-01 |
| First_to_finish | 0.018 | -0.026 | 0.061 | 4.28E-01 | 2020 | 4.41E-01 |
| Show-each_other_work | -0.110 | -0.153 | -0.067 | 7.32E-07 | 2019 | 9.96E-07 |
| Tell_each_other_reports | -0.085 | -0.128 | -0.041 | 1.45E-04 | 2016 | 1.90E-04 |
| Teacher_makes_work-interesting | -0.138 | -0.181 | -0.095 | 4.20E-10 | 2018 | 6.80E-10 |
| Teacher_likes_work | -0.140 | -0.182 | -0.097 | 2.97E-10 | 2013 | 5.04E-10 |
| teacher_explains_why | -0.046 | -0.090 | -0.003 | 3.76E-02 | 2012 | 4.26E-02 |
| Wait_a_long_time | 0.206 | 0.164 | 0.248 | 8.94E-21 | 2016 | 3.80E-20 |
| Teacher_shows_interest | -0.164 | -0.206 | -0.121 | 1.39E-13 | 2015 | 2.95E-13 |
| Express_opinions | -0.171 | -0.213 | -0.128 | 1.08E-14 | 2015 | 2.45E-14 |
| Teaching | -0.176 | -0.218 | -0.133 | 1.67E-15 | 2017 | 4.37E-15 |
| Teacher_help | -0.171 | -0.214 | -0.129 | 8.88E-15 | 2017 | 2.16E-14 |
| Teacher_homework_checks | -0.154 | -0.196 | -0.111 | 4.39E-12 | 2009 | 8.29E-12 |
| cannot_work_well | 0.218 | 0.176 | 0.260 | 3.64E-23 | 2012 | 2.06E-22 |
| DonotListen | 0.221 | 0.179 | 0.262 | 1.18E-23 | 2015 | 8.04E-23 |
| Noise_disorder | 0.215 | 0.173 | 0.256 | 2.41E-22 | 2006 | 1.17E-21 |
| Doing_nothing | 0.190 | 0.147 | 0.232 | 8.49E-18 | 2015 | 3.21E-17 |
| library | -0.022 | -0.065 | 0.022 | 3.23E-01 | 2026 | 3.43E-01 |
| Computers | -0.070 | -0.113 | -0.026 | 1.70E-03 | 2025 | 2.15E-03 |
| Internet | -0.048 | -0.092 | -0.005 | 2.93E-02 | 2025 | 3.43E-02 |
| Science_Lab | -0.178 | -0.220 | -0.135 | 7.51E-16 | 2024 | 2.13E-15 |
| Attitude_science | -0.121 | -0.164 | -0.078 | 4.29E-08 | 2035 | 6.07E-08 |
| Attitide_maths | -0.143 | -0.185 | -0.100 | 1.06E-10 | 2035 | 1.89E-10 |
| Attitude_English | -0.060 | -0.103 | -0.016 | 7.15E-03 | 2032 | 8.69E-03 |

## Supplementary Table S8. Contemporaneous correlations between educational experiences and internalising factor at ages 7, 9 and 16.

| **Age 7** | **r** | **95% Cl** | | p | N | p_fdr |
| --- | --- | --- | --- | --- | --- | --- |
| Time_off_school | 0.024 | -0.007 | 0.054 | 1.28E-01 | 4181 | 1.28E-01 |
| Feel_sch | -0.175 | -0.196 | -0.153 | 8.77E-54 | 7700 | 1.75E-53 |
| **Age 9** |  |  |  |  |  |  |
| Peer_parent | -0.308 | -0.338 | -0.277 | 4.74E-75 | 3374 | 1.35E-74 |
| Peer_teacher | -0.290 | -0.323 | -0.256 | 4.94E-57 | 2882 | 1.10E-56 |
| Peer_self | -0.208 | -0.241 | -0.175 | 1.09E-33 | 3305 | 1.56E-33 |
| Classroom_parent | -0.394 | -0.422 | -0.365 | 3.46E-126 | 3395 | 1.15E-125 |
| Classroom_teacher | -0.440 | -0.469 | -0.410 | 1.50E-136 | 2880 | 1.00E-135 |
| Classroom_self | -0.230 | -0.262 | -0.197 | 5.95E-41 | 3314 | 9.16E-41 |
| Teach_parent | -0.240 | -0.271 | -0.208 | 1.25E-45 | 3392 | 2.49E-45 |
| Teach_self | -0.161 | -0.194 | -0.128 | 1.13E-20 | 3311 | 1.51E-20 |
| NegAffect_parent | 0.418 | 0.389 | 0.445 | 3.28E-143 | 3392 | 3.28E-142 |
| NegAffect_self | 0.411 | 0.383 | 0.439 | 1.84E-135 | 3311 | 9.22E-135 |
| Aventure_parent | -0.229 | -0.260 | -0.197 | 1.41E-41 | 3395 | 2.36E-41 |
| Aventure_self | -0.070 | -0.104 | -0.036 | 5.36E-05 | 3313 | 6.30E-05 |
| Opportunity_parent | -0.233 | -0.264 | -0.201 | 7.01E-43 | 3390 | 1.28E-42 |
| Opportunity_self | -0.122 | -0.156 | -0.089 | 1.59E-12 | 3313 | 1.99E-12 |
| Acceptance_parent | -0.553 | -0.576 | -0.529 | 1.62E-271 | 3394 | 3.23E-270 |
| Acceptance_self | -0.407 | -0.435 | -0.379 | 1.04E-132 | 3315 | 4.18E-132 |
| Classsize | -0.035 | -0.071 | 0.001 | 5.94E-02 | 2891 | 6.25E-02 |
| HW_night_teacher | -0.038 | -0.075 | -0.002 | 4.07E-02 | 2868 | 4.53E-02 |
| HW_finish_teacher | -0.308 | -0.341 | -0.275 | 5.29E-64 | 2860 | 1.32E-63 |
| HW_others_teacher | 0.016 | -0.021 | 0.053 | 3.92E-01 | 2813 | 3.92E-01 |
| **Age 16** |  |  |  |  |  |  |
| Student_teacher_relationship | -0.109 | -0.152 | -0.066 | 8.15E-07 | 2029 | 1.73E-06 |
| Relevance of school work | -0.115 | -0.158 | -0.072 | 2.12E-07 | 2027 | 5.54E-07 |
| Peer_support | -0.234 | -0.274 | -0.192 | 1.57E-26 | 2026 | 1.78E-25 |
| Homework_behaviour | -0.108 | -0.151 | -0.065 | 9.55E-07 | 2046 | 1.91E-06 |
| HW_feedback | -0.089 | -0.132 | -0.045 | 6.32E-05 | 2027 | 9.34E-05 |
| Homework | -0.121 | -0.163 | -0.078 | 4.95E-08 | 2027 | 1.53E-07 |
| Attitudes to school | -0.239 | -0.279 | -0.198 | 6.06E-28 | 2046 | 1.03E-26 |
| Satisfaction with school | -0.290 | -0.329 | -0.251 | 2.71E-42 | 2110 | 9.22E-41 |
| Classroom environment | -0.045 | -0.088 | -0.002 | 4.26E-02 | 2026 | 5.18E-02 |
| Classroom_help_peers | -0.108 | -0.151 | -0.065 | 1.20E-06 | 2016 | 2.27E-06 |
| Classroom_first_answer | 0.041 | -0.003 | 0.084 | 6.84E-02 | 2018 | 8.02E-02 |
| First_to_finish | 0.031 | -0.013 | 0.074 | 1.69E-01 | 2020 | 1.79E-01 |
| Show-each_other_work | -0.102 | -0.145 | -0.059 | 4.41E-06 | 2019 | 7.50E-06 |
| Tell_each_other_reports | -0.126 | -0.169 | -0.083 | 1.40E-08 | 2016 | 4.77E-08 |
| Teacher_makes_work-interesting | -0.092 | -0.135 | -0.048 | 3.68E-05 | 2018 | 5.69E-05 |
| Teacher_likes_work | -0.081 | -0.124 | -0.037 | 2.81E-04 | 2013 | 3.82E-04 |
| teacher_explains_why | -0.022 | -0.065 | 0.022 | 3.29E-01 | 2012 | 3.29E-01 |
| Wait_a_long_time | 0.144 | 0.101 | 0.186 | 9.12E-11 | 2016 | 4.43E-10 |
| Teacher_shows_interest | -0.115 | -0.158 | -0.071 | 2.48E-07 | 2015 | 6.02E-07 |
| Express_opinions | -0.130 | -0.173 | -0.087 | 4.18E-09 | 2015 | 1.58E-08 |
| Teaching | -0.112 | -0.154 | -0.068 | 5.14E-07 | 2017 | 1.17E-06 |
| Teacher_help | -0.101 | -0.144 | -0.057 | 5.79E-06 | 2017 | 9.37E-06 |
| Teacher_homework_checks | -0.106 | -0.149 | -0.063 | 1.82E-06 | 2009 | 3.26E-06 |
| cannot_work_well | 0.181 | 0.138 | 0.223 | 3.23E-16 | 2012 | 2.20E-15 |
| DonotListen | 0.184 | 0.142 | 0.226 | 7.06E-17 | 2015 | 6.00E-16 |
| Noise_disorder | 0.175 | 0.132 | 0.217 | 3.44E-15 | 2006 | 1.95E-14 |
| Doing_nothing | 0.137 | 0.094 | 0.180 | 6.23E-10 | 2015 | 2.65E-09 |
| library | 0.027 | -0.017 | 0.070 | 2.32E-01 | 2026 | 2.39E-01 |
| Computers | -0.032 | -0.075 | 0.012 | 1.53E-01 | 2025 | 1.68E-01 |
| Internet | -0.033 | -0.076 | 0.011 | 1.43E-01 | 2025 | 1.62E-01 |
| Science_Lab | -0.117 | -0.160 | -0.074 | 1.24E-07 | 2024 | 3.51E-07 |
| Attitude_science | -0.046 | -0.089 | -0.002 | 3.94E-02 | 2035 | 4.96E-02 |
| Attitide_maths | -0.088 | -0.131 | -0.045 | 6.60E-05 | 2035 | 9.35E-05 |
| Attitude_English | -0.065 | -0.108 | -0.021 | 3.55E-03 | 2032 | 4.64E-03 |

## Supplementary Table S9. Contemporaneous correlations between educational experiences and externalising factor at ages 7, 9 and 16.

| **Age 7** | **r** | **95% CI** | | p | N | p_fdr |
| --- | --- | --- | --- | --- | --- | --- |
| Time_off_school | 0.026 | -0.004 | 0.057 | 8.73E-02 | 4181 | 8.73E-02 |
| Feel_sch | -0.187 | -0.209 | -0.165 | 1.26E-61 | 7700 | 2.51E-61 |
| **Age 9** |  |  |  |  |  |  |
| Peer_parent | -0.343 | -0.372 | -0.313 | 1.27E-93 | 3374 | 6.37E-93 |
| Peer_teacher | -0.401 | -0.431 | -0.370 | 8.36E-112 | 2881 | 5.58E-111 |
| Peer_self | -0.158 | -0.191 | -0.125 | 5.08E-20 | 3305 | 6.93E-20 |
| Classroom_parent | -0.325 | -0.355 | -0.295 | 1.48E-84 | 3395 | 5.92E-84 |
| Classroom_teacher | -0.424 | -0.454 | -0.394 | 3.67E-126 | 2879 | 7.34E-125 |
| Classroom_self | -0.175 | -0.208 | -0.142 | 2.65E-24 | 3314 | 4.08E-24 |
| Teach_parent | -0.246 | -0.277 | -0.214 | 6.69E-48 | 3392 | 1.34E-47 |
| Teach_self | -0.158 | -0.191 | -0.125 | 5.19E-20 | 3311 | 6.93E-20 |
| NegAffect_parent | 0.265 | 0.233 | 0.296 | 1.78E-55 | 3392 | 3.96E-55 |
| NegAffect_self | 0.281 | 0.249 | 0.312 | 4.61E-61 | 3311 | 1.15E-60 |
| Aventure_parent | -0.315 | -0.345 | -0.285 | 3.62E-79 | 3395 | 1.03E-78 |
| Aventure_self | -0.108 | -0.141 | -0.074 | 4.91E-10 | 3313 | 5.77E-10 |
| Opportunity_parent | -0.236 | -0.267 | -0.204 | 5.18E-44 | 3390 | 9.41E-44 |
| Opportunity_self | -0.115 | -0.149 | -0.082 | 2.70E-11 | 3313 | 3.37E-11 |
| Acceptance_parent | -0.321 | -0.351 | -0.290 | 3.68E-82 | 3394 | 1.23E-81 |
| Acceptance_self | -0.224 | -0.256 | -0.191 | 6.62E-39 | 3315 | 1.10E-38 |
| Classsize | -0.038 | -0.074 | -0.001 | 4.18E-02 | 2890 | 4.64E-02 |
| HW_night_teacher | -0.009 | -0.046 | 0.027 | 6.12E-01 | 2867 | 6.12E-01 |
| HW_finish_teacher | -0.403 | -0.434 | -0.372 | 2.23E-112 | 2859 | 2.23E-111 |
| HW_others_teacher | 0.021 | -0.016 | 0.058 | 2.61E-01 | 2812 | 2.75E-01 |
| **Age 16** |  |  |  |  |  |  |
| Student_teacher_relationship | -0.148 | -0.191 | -0.106 | 1.79E-11 | 2029 | 4.06E-11 |
| Relevance of school work | -0.171 | -0.213 | -0.129 | 8.69E-15 | 2027 | 2.96E-14 |
| Peer_support | -0.120 | -0.162 | -0.077 | 6.48E-08 | 2026 | 9.18E-08 |
| Homework_behaviour | -0.340 | -0.378 | -0.301 | 1.60E-56 | 2046 | 2.73E-55 |
| HW_feedback | -0.120 | -0.163 | -0.077 | 6.27E-08 | 2027 | 9.18E-08 |
| Homework | -0.255 | -0.295 | -0.214 | 1.67E-31 | 2027 | 1.42E-30 |
| Attitudes to school | -0.258 | -0.298 | -0.217 | 1.86E-32 | 2046 | 2.11E-31 |
| Satisfaction with school | -0.339 | -0.376 | -0.301 | 6.75E-58 | 2110 | 2.29E-56 |
| Classroom environment | 0.001 | -0.042 | 0.045 | 9.57E-01 | 2026 | 9.57E-01 |
| Classroom_help_peers | -0.122 | -0.165 | -0.079 | 3.58E-08 | 2016 | 5.54E-08 |
| Classroom_first_answer | -0.004 | -0.047 | 0.040 | 8.63E-01 | 2018 | 9.17E-01 |
| First_to_finish | 0.002 | -0.041 | 0.046 | 9.14E-01 | 2020 | 9.42E-01 |
| Show-each_other_work | -0.094 | -0.137 | -0.051 | 2.28E-05 | 2019 | 3.10E-05 |
| Tell_each_other_reports | -0.048 | -0.092 | -0.005 | 3.00E-02 | 2016 | 3.77E-02 |
| Teacher_makes_work-interesting | -0.127 | -0.170 | -0.084 | 1.03E-08 | 2018 | 1.67E-08 |
| Teacher_likes_work | -0.137 | -0.180 | -0.094 | 6.49E-10 | 2013 | 1.16E-09 |
| teacher_explains_why | -0.042 | -0.085 | 0.002 | 6.09E-02 | 2012 | 7.14E-02 |
| Wait_a_long_time | 0.192 | 0.150 | 0.234 | 3.22E-18 | 2016 | 1.83E-17 |
| Teacher_shows_interest | -0.147 | -0.190 | -0.104 | 3.09E-11 | 2015 | 6.57E-11 |
| Express_opinions | -0.152 | -0.194 | -0.109 | 7.05E-12 | 2015 | 1.71E-11 |
| Teaching | -0.169 | -0.211 | -0.127 | 1.90E-14 | 2017 | 4.97E-14 |
| Teacher_help | -0.170 | -0.212 | -0.128 | 1.32E-14 | 2017 | 3.75E-14 |
| Teacher_homework_checks | -0.144 | -0.187 | -0.101 | 8.41E-11 | 2009 | 1.68E-10 |
| cannot_work_well | 0.193 | 0.150 | 0.235 | 2.56E-18 | 2012 | 1.74E-17 |
| DonotListen | 0.191 | 0.148 | 0.233 | 5.56E-18 | 2015 | 2.70E-17 |
| Noise_disorder | 0.189 | 0.146 | 0.230 | 1.65E-17 | 2006 | 7.02E-17 |
| Doing_nothing | 0.175 | 0.132 | 0.217 | 2.44E-15 | 2015 | 9.23E-15 |
| library | -0.030 | -0.074 | 0.013 | 1.71E-01 | 2026 | 1.87E-01 |
| Computers | -0.073 | -0.116 | -0.030 | 9.91E-04 | 2025 | 1.30E-03 |
| Internet | -0.044 | -0.088 | -0.001 | 4.56E-02 | 2025 | 5.54E-02 |
| Science_Lab | -0.170 | -0.212 | -0.128 | 1.29E-14 | 2024 | 3.75E-14 |
| Attitude_science | -0.127 | -0.169 | -0.084 | 9.83E-09 | 2035 | 1.67E-08 |
| Attitide_maths | -0.137 | -0.179 | -0.094 | 5.65E-10 | 2035 | 1.07E-09 |
| Attitude_English | -0.040 | -0.083 | 0.004 | 7.44E-02 | 2032 | 8.43E-02 |

## Supplementary Table S10. Contemporaneous correlations between educational experiences and internalising factor using self-reported measures only at ages 9 and 16.

| **Age 9** | **r** | **95% CI** | | p | N | p_fdr |
| --- | --- | --- | --- | --- | --- | --- |
| Peer_parent | -0.185 | -0.217 | -0.152 | 5.57E-27 | 3334 | 1.59E-26 |
| Peer_teacher | -0.097 | -0.137 | -0.058 | 1.54E-06 | 2432 | 2.05E-06 |
| Peer_self | -0.200 | -0.232 | -0.167 | 5.17E-31 | 3302 | 1.72E-30 |
| Classroom_parent | -0.205 | -0.238 | -0.173 | 2.80E-33 | 3354 | 1.12E-32 |
| Classroom_teacher | -0.100 | -0.139 | -0.061 | 7.48E-07 | 2430 | 1.07E-06 |
| Classroom_self | -0.167 | -0.200 | -0.133 | 4.89E-22 | 3311 | 1.22E-21 |
| Teach_parent | -0.129 | -0.162 | -0.096 | 5.71E-14 | 3351 | 1.04E-13 |
| Teach_self | -0.110 | -0.144 | -0.076 | 2.22E-10 | 3308 | 3.70E-10 |
| NegAffect_parent | 0.269 | 0.237 | 0.300 | 1.47E-56 | 3351 | 7.35E-56 |
| NegAffect_self | 0.459 | 0.432 | 0.485 | 4.79E-172 | 3308 | 9.57E-171 |
| Aventure_parent | -0.097 | -0.130 | -0.063 | 1.85E-08 | 3354 | 2.84E-08 |
| Aventure_self | 0.012 | -0.022 | 0.046 | 4.76E-01 | 3310 | 5.60E-01 |
| Opportunity_parent | -0.130 | -0.163 | -0.096 | 5.35E-14 | 3349 | 1.04E-13 |
| Opportunity_self | -0.051 | -0.085 | -0.017 | 3.16E-03 | 3310 | 3.95E-03 |
| Acceptance_parent | -0.277 | -0.308 | -0.245 | 5.72E-60 | 3353 | 3.82E-59 |
| Acceptance_self | -0.348 | -0.377 | -0.318 | 8.00E-95 | 3312 | 8.00E-94 |
| Classsize | 0.008 | -0.032 | 0.048 | 6.89E-01 | 2439 | 7.26E-01 |
| HW_night_teacher | 0.000 | -0.039 | 0.040 | 9.85E-01 | 2418 | 9.85E-01 |
| HW_finish_teacher | -0.178 | -0.217 | -0.139 | 9.98E-19 | 2418 | 2.22E-18 |
| HW_others_teacher | -0.011 | -0.051 | 0.029 | 5.95E-01 | 2378 | 6.61E-01 |
| **Age 16** |  |  |  |  |  |  |
| Student_teacher_relationship | -0.086 | -0.130 | -0.043 | 1.02E-04 | 2019 | 1.74E-04 |
| Relevance of school work | -0.105 | -0.148 | -0.062 | 2.19E-06 | 2017 | 5.73E-06 |
| Peer_support | -0.212 | -0.254 | -0.170 | 5.55E-22 | 2016 | 9.44E-21 |
| Homework_behaviour | -0.105 | -0.148 | -0.062 | 2.02E-06 | 2036 | 5.73E-06 |
| HW_feedback | -0.107 | -0.150 | -0.064 | 1.46E-06 | 2018 | 4.50E-06 |
| Homework | -0.134 | -0.176 | -0.091 | 1.56E-09 | 2018 | 6.62E-09 |
| Attitudes to school | -0.195 | -0.237 | -0.153 | 5.62E-19 | 2036 | 6.37E-18 |
| Satisfaction with school | -0.258 | -0.297 | -0.218 | 3.04E-33 | 2098 | 1.04E-31 |
| Classroom environment | -0.048 | -0.092 | -0.005 | 3.02E-02 | 2017 | 3.54E-02 |
| Classroom_help_peers | -0.073 | -0.116 | -0.029 | 1.15E-03 | 2007 | 1.70E-03 |
| Classroom_first_answer | 0.090 | 0.046 | 0.133 | 5.83E-05 | 2009 | 1.10E-04 |
| First_to_finish | 0.067 | 0.023 | 0.110 | 2.63E-03 | 2011 | 3.58E-03 |
| Show-each_other_work | -0.046 | -0.089 | -0.002 | 4.12E-02 | 2010 | 4.67E-02 |
| Tell_each_other_reports | -0.068 | -0.111 | -0.024 | 2.32E-03 | 2007 | 3.29E-03 |
| Teacher_makes_work-interesting | -0.087 | -0.130 | -0.043 | 1.02E-04 | 2009 | 1.74E-04 |
| Teacher_likes_work | -0.061 | -0.105 | -0.017 | 6.12E-03 | 2004 | 8.01E-03 |
| teacher_explains_why | -0.024 | -0.068 | 0.020 | 2.83E-01 | 2003 | 3.00E-01 |
| Wait_a_long_time | 0.121 | 0.077 | 0.164 | 5.89E-08 | 2007 | 2.00E-07 |
| Teacher_shows_interest | -0.103 | -0.146 | -0.059 | 4.18E-06 | 2006 | 9.47E-06 |
| Express_opinions | -0.128 | -0.171 | -0.085 | 7.80E-09 | 2006 | 2.95E-08 |
| Teaching | -0.105 | -0.148 | -0.061 | 2.51E-06 | 2008 | 6.10E-06 |
| Teacher_help | -0.091 | -0.134 | -0.048 | 4.22E-05 | 2008 | 8.45E-05 |
| Teacher_homework_checks | -0.077 | -0.120 | -0.033 | 6.05E-04 | 2001 | 9.34E-04 |
| cannot_work_well | 0.170 | 0.127 | 0.212 | 2.13E-14 | 2003 | 1.20E-13 |
| DonotListen | 0.172 | 0.129 | 0.214 | 9.27E-15 | 2006 | 6.30E-14 |
| Noise_disorder | 0.176 | 0.134 | 0.219 | 1.95E-15 | 1997 | 1.66E-14 |
| Doing_nothing | 0.142 | 0.099 | 0.185 | 1.56E-10 | 2006 | 7.58E-10 |
| library | 0.053 | 0.010 | 0.097 | 1.70E-02 | 2017 | 2.06E-02 |
| Computers | -0.007 | -0.051 | 0.036 | 7.39E-01 | 2016 | 7.39E-01 |
| Internet | -0.019 | -0.063 | 0.024 | 3.83E-01 | 2016 | 3.94E-01 |
| Science_Lab | -0.082 | -0.125 | -0.039 | 2.20E-04 | 2015 | 3.56E-04 |
| Attitude_science | -0.039 | -0.082 | 0.005 | 8.12E-02 | 2025 | 8.90E-02 |
| Attitide_maths | -0.094 | -0.137 | -0.051 | 2.13E-05 | 2025 | 4.53E-05 |
| Attitude_English | -0.053 | -0.097 | -0.010 | 1.68E-02 | 2022 | 2.06E-02 |

## Supplementary Table S11. Variance explained by linear regression in SEM models

| **Contemporaneous models** |  |  |  |  |
| --- | --- | --- | --- | --- |
|  | Model | N | R2 | Adj_R2 |
| Age 7 | SEM | 7899 | 0.052 | 0.052 |
| Age9 | SEM | 3862 | 0.555 | 0.552 |
| Age 16 | SEM | 5838 | 0.270 | 0.266 |
|  |  |  |  |  |
| **Additive models** |  |  |  |  |
| Age 9 | SEM | 8268 | 0.559 | 0.558 |
| Age 16 | SEM | 9070 | 0.356 | 0.351 |
| Age 21 | SEM | 9438 | 0.257 | 0.252 |
|  |  |  |  |  |
| **Adjusted for PGS** |  |  |  |  |
|  | Model | N | R2 | Adj_R2 |
| Age 7 | SEM | 8898 | 0.048 | 0.048 |
| Age 9 | SEM | 6873 | 0.528 | 0.529 |
| Age 16 | SEM | 7256 | 0.335 | 0.333 |
| Age 21 | SEM | 7841 | 0.231 | 0.228 |
|  |  |  |  |  |
| **Adjusted for PGS and mental health at age 7** |  |  |  |  |
|  | Model | N | R2 | Adj_R2 |
| Age 9 | SEM | 9170 | 0.311 | 0.311 |
| Age 16 | SEM | 9365 | 0.236 | 0.233 |
| Age 21 | SEM | 9642 | 0.168 | 0.164 |
|  |  |  |  |  |
| **Adjusted for PGS and mental health at age 7 and SES** |  |  |  |  |
|  | Model | N | R2 | Adj_R2 |
| Age 9 | SEM | 12869 | 0.303 | 0.303 |
| Age 16 | SEM | 12905 | 0.225 | 0.223 |
| Age 21 | SEM | 12959 | 0.163 | 0.160 |
|  |  |  |  |  |
| **Adjusted for PGS and mental health at age 7, SES and menatl health at previous adjustement age** |  |  |  |  |
|  | Model | N | R2 | Adj_R2 |
| Age 16 | SEM | 12947 | 0.138 | 0.136 |
| Age 21 | SEM | 13033 | 0.061 | 0.058 |
|  |  |  |  |  |

## Supplementary Table S12. Variance explained using Elastic Net models

| **Contemporaneous models** | | | |  |  |  |  |  |  |  |
| --- | --- | --- | --- | --- | --- | --- | --- | --- | --- | --- |
|  | **mean_cv_RMSE_train** | **sd_cv_RMSE_train** | **mean_cv_R2_train** | **sd_cv_R2_train** | **RMSE** | **Rsquare** | **alpha** | **lambda** | **N_train** | **N_test** |
| **Age 7** | 0.989 | 0.004 | 0.060 | 0.000 | 0.989 | 0.065 | 0.200 | 0.003 | 3341 | 832 |
| **Age 9** | 0.675 | 0.047 | 0.497 | 0.033 | 0.599 | 0.600 | 0.700 | 0.013 | 1794 | 448 |
| **Age 16** | 0.853 | 0.014 | 0.187 | 0.012 | 0.833 | 0.240 | 0.100 | 0.055 | 1536 | 380 |
|  |  |  |  |  |  |  |  |  |  |  |
| **Additive models** |  |  |  |  |  |  |  |  |  |  |
|  | **mean_cv_RMSE_train** | **sd_cv_RMSE_train** | **mean_cv_R2_train** | **sd_cv_R2_train** | **RMSE** | **Rsquare** | **alpha** | **lambda** | **N_train** | **N_test** |
| **Age 9** | 0.652 | 0.047 | 0.538 | 0.024 | 0.621 | 0.596 | 0.100 | 0.072 | 715 | 176 |
| **Age 16** | 0.890 | 0.020 | 0.225 | 0.019 | 0.720 | 0.221 | 0.100 | 0.318 | 363 | 88 |
| **Age 21** | 0.948 | 0.019 | 0.138 | 0.014 | 0.836 | 0.180 | 0.100 | 0.246 | 381 | 92 |

| **Adjusted for PGS** | | |  |  |  |  |  |  |  |  |  |  |  |  |  |  |  |  |  |  |
| --- | --- | --- | --- | --- | --- | --- | --- | --- | --- | --- | --- | --- | --- | --- | --- | --- | --- | --- | --- | --- |
|  | **mean_cv_RMSE_base** | **sd_cv_RMSE_base** | **mean_cv_R2_base** | **sd_cv_R2_base** | **mean_cv_RMSE_full** | **sd_cv_RMSE_full** | **mean_cv_R2_full** | **sd_cv_R2_full** | **delta_cv_R2** | **RMSE_base** | **Rsquare_base** | **RMSE_full** | **Rsquare_full** | **delta_test_R2** | **alpha_base** | **lambda_base** | **alpha_full** | **lambda_full** | **N_train** | **N_test** |
| **Age 7** | 1.014 | 0.002 | 0.014 | 0.001 | 0.988 | 0.004 | 0.062 | 0.002 | 0.048 | 0.989 | 0.005 | 0.960 | 0.065 | 0.060 | 1.000 | 0.038 | 1.000 | 0.039 | 1733 | 432 |
| **Age 9** | 0.952 | 0.012 | 0.033 | 0.008 | 0.659 | 0.047 | 0.535 | 0.031 | 0.502 | 0.837 | 0.025 | 0.561 | 0.562 | 0.537 | 0.600 | 0.163 | 0.900 | 0.034 | 412 | 100 |
| **Age 16** | 0.990 | 0.021 | 0.039 | 0.004 | 0.907 | 0.056 | 0.233 | 0.028 | 0.194 | 0.956 | 0.013 | 0.817 | 0.277 | 0.264 | 0.600 | 0.139 | 0.100 | 0.334 | 231 | 56 |
| **Age 21** | 1.036 | 0.026 | 0.045 | 0.006 | 1.022 | 0.069 | 0.147 | 0.025 | 0.102 | 1.004 | 0.010 | 0.962 | 0.118 | 0.108 | 0.500 | 0.164 | 0.100 | 0.267 | 245 | 60 |
| **Adjusted for PGS and menatal health at age 7 and SES** | | | | | | | | | | | | | | | | |
|  | **mean_cv_RMSE_base** | **sd_cv_RMSE_base** | **mean_cv_R2_base** | **sd_cv_R2_base** | **mean_cv_RMSE_full** | **sd_cv_RMSE_full** | **mean_cv_R2_full** | **sd_cv_R2_full** | **delta_cv_R2** | **RMSE_base** | **Rsquare_base** | **RMSE_full** | **Rsquare_full** | **delta_test_R2** | **alpha_base** | **lambda_base** | **alpha_full** | **lambda_full** | **N_train** | **N_test** |
| **Age 9** | 0.806 | 0.018 | 0.295 | 0.017 | 0.630 | 0.051 | 0.579 | 0.031 | 0.284 | 0.761 | 0.190 | 0.551 | 0.576 | 0.386 | 0.700 | 0.083 | 0.900 | 0.036 | 412 | 100 |
| **Age 16** | 0.928 | 0.024 | 0.117 | 0.026 | 0.902 | 0.060 | 0.244 | 0.035 | 0.127 | 0.871 | 0.186 | 0.800 | 0.308 | 0.122 | 1.000 | 0.056 | 0.100 | 0.334 | 231 | 56 |
| **Age 21** | 1.015 | 0.026 | 0.060 | 0.013 | 1.026 | 0.072 | 0.144 | 0.026 | 0.084 | 0.983 | 0.050 | 0.961 | 0.120 | 0.070 | 0.800 | 0.086 | 0.100 | 0.267 | 245 | 60 |
|  |  |  |  |  |  |  |  |  |  |  |  |  |  |  |  |  |  |  |  |  |
| **Adjusted for PGS and mental health at age 7 and SES** | | | | | | | | | | | | | | | |
|  | **mean_cv_RMSE_base** | **sd_cv_RMSE_base** | **mean_cv_R2_base** | **sd_cv_R2_base** | **mean_cv_RMSE_full** | **sd_cv_RMSE_full** | **mean_cv_R2_full** | **sd_cv_R2_full** | **delta_cv_R2** | **RMSE_base** | **Rsquare_base** | **RMSE_full** | **Rsquare_full** | **delta_test_R2** | **alpha_base** | **lambda_base** | **alpha_full** | **lambda_full** | **N_train** | **N_test** |
| **Age 9** | 0.824 | 0.017 | 0.260 | 0.018 | 0.625 | 0.052 | 0.582 | 0.032 | 0.322 | 0.726 | 0.357 | 0.597 | 0.551 | 0.194 | 0.600 | 0.078 | 1.000 | 0.035 | 393 | 96 |
| **Age 16** | 0.948 | 0.024 | 0.124 | 0.025 | 0.918 | 0.059 | 0.254 | 0.026 | 0.130 | 0.857 | 0.161 | 0.827 | 0.212 | 0.051 | 0.800 | 0.135 | 0.100 | 0.347 | 223 | 52 |
| **Age 21** | 1.026 | 0.027 | 0.072 | 0.016 | 1.033 | 0.094 | 0.162 | 0.057 | 0.090 | 0.935 | 0.093 | 0.979 | 0.051 | -0.042 | 0.200 | 0.216 | 0.400 | 0.177 | 237 | 56 |
|  |  |  |  |  |  |  |  |  |  |  |  |  |  |  |  |  |  |  |  |  |
| **Adjusted for PGS and mental health at age 7, SES and mental health at previous adjustment age** | | | | | | | | | |
|  | **mean_cv_RMSE_base** | **sd_cv_RMSE_base** | **mean_cv_R2_base** | **sd_cv_R2_base** | **mean_cv_RMSE_full** | **sd_cv_RMSE_full** | **mean_cv_R2_full** | **sd_cv_R2_full** | **delta_cv_R2** | **RMSE_base** | **Rsquare_base** | **RMSE_full** | **Rsquare_full** | **delta_test_R2** | **alpha_base** | **lambda_base** | **alpha_full** | **lambda_full** | **N_train** | **N_test** |
| **Age 16** | 0.832 | 0.022 | 0.322 | 0.026 | 0.870 | 0.065 | 0.326 | 0.047 | 0.004 | 0.757 | 0.329 | 0.739 | 0.356 | 0.028 | 0.900 | 0.092 | 0.800 | 0.092 | 223 | 52 |
| **Age 21** | 0.825 | 0.027 | 0.358 | 0.031 | 0.947 | 0.098 | 0.264 | 0.081 | -0.094 | 0.931 | 0.226 | 0.893 | 0.285 | 0.059 | 0.800 | 0.098 | 0.900 | 0.098 | 208 | 50 |

##

## Supplementary Table S13. Variance explained by linear regression

| **Contemporaneous models** | | |  |  |  |  |  |  |
| --- | --- | --- | --- | --- | --- | --- | --- | --- |
|  | Model | N | R2 | Adj_R2 | SE_R2 | SE_Adj_R2 | F | p |
| Age 7 | LM | 4173 | 0.059 | 0.059 | 0.008 | 0.008 | 131.170 | 5.68E-56 |
| Age9 | LM | 2242 | 0.534 | 0.530 | 0.016 | 0.017 | 127.382 | 5.68E-56 |
| Age 16 | LM | 1916 | 0.2259 | 0.212 | 0.017 | 0.018 | 6.144 | 2.64E-81 |
|  |  |  |  |  |  |  |  |  |
| **Additive models** | |  |  |  |  |  |  |  |
|  | Model | N | R2 | Adj_R2 | SE_R2 | SE_Adj_R2 | F | p |
| Age 9 | LM | 891 | 0.579 | 0.569 | 0.0229 | 0.0235 | 54.351 | 1.84E-146 |
| Age 16 | LM | 451 | 0.376 | 0.287 | 0.018 | 0.018 | 4.236 | 1.05E-17 |
| Age 21 | LM | 473 | 0.304 | 0.211 | 0.034 | 0.039 | 3.249 | 5.36E-12 |
|  |  |  |  |  |  |  |  |  |
| **Adjusted for PGS** | |  |  |  |  |  |  |  |
|  | Model | N | R2 | Adj_R2 | SE_R2 | SE_Adj_R2 | F-change | p_change |
| Age 7 | LM | 2165 | 0.053 | 0.053 | 0.010 | 0.011 | 61.463 | 1.11E-26 |
| Age 9 | LM | 512 | 0.541 | 0.552 | 0.032 | 0.034 | 30.073 | 5.40E-75 |
| Age 16 | LM | 287 | 0.441 | 0.351 | 0.038 | 0.049 | 3.599 | 1.55E-11 |
| Age 21 | LM | 305 | 0.323 | 0.196 | 0.042 | 0.053 | 2.234 | 1.92E-05 |
|  |  |  |  |  |  |  |  |  |
| **Adjusted for PGS and mental health at age 7** | | | |  |  |  |  |  |
|  | Model | N | R2 | Adj_R2 | SE_R2 | SE_Adj_R2 | F-change | p_change |
| Age 9 | LM | 512 | 0.321 | 0.322 | 0.030 | 0.032 | 19.355 | 3.25E-52 |
| Age 16 | LM | 287 | 0.337 | 0.240 | 0.038 | 0.048 | 2.781 | 8.53E-08 |
| Age 21 | LM | 305 | 0.282 | 0.151 | 0.041 | 0.052 | 1.946 | 3.64E-04 |
|  |  |  |  |  |  |  |  |  |
| **Adjusted for PGS and mental health at age 7 and SES** | | | | |  |  |  |  |
|  | Model | N | R2 | Adj_R2 | SE_R2 | SE_Adj_R2 |  |  |
| Age 9 | LM | 489 | 0.322 | 0.324 | 0.031 | 0.034 | 18.489 | 2.30E-49 |
| Age 16 | LM | 275 | 0.338 | 0.235 | 0.041 | 0.051 | 2.643 | 4.92E-07 |
| Age 21 | LM | 293 | 0.290 | 0.162 | 0.039 | 0.050 | 2.013 | 2.13E-04 |
|  |  |  |  |  |  |  |  |  |
| **Adjusted for PGS and mental health at age 7, SES and mental health at previous adjustment age** | | | | | | | |  |
|  | Model | N | R2 | Adj_R2 | SE_R2 | SE_Adj_R2 |  |  |
| Age 16 | LM | 293 | 0.215 | 0.114 | 0.035 | 0.044 | 1.887 | 8.50E-04 |
| Age 21 | LM | 258 | 0.198 | 0.081 | 0.036 | 0.045 | 1.565 | 1.53E-02 |

## Supplementary Table S14. Genetic, shared environmental and non-shared environmental components of variance for P-factor and poly-environmental score (PES) (95% CI)

| **Phenotype** | **A** | **C** | **E** |
| --- | --- | --- | --- |
| P 7 | 0.657 (0.607–0.707) | 0.088 (0.046–0.132) | 0.255 (0.241–0.270) |
| P 9 | 0.705 (0.639–0.772) | 0.094 (0.034–0.155) | 0.201 (0.186–0.218) |
| P 16 | 0.584 (0.538–0.632) | 0.260 (0.213–0.304) | 0.156 (0.145–0.167) |
| P 21 | 0.512 (0.439–0.586) | 0.071 (0.010–0.132) | 0.416 (0.392–0.443) |
| PES 7 | 0.429 (0.361–0.499) | 0.314 (0.251–0.373) | 0.257 (0.237–0.279) |
| PES 9 | 0.469 (0.397–0.540) | 0.125 (0.082–0.183) | 0.407 (0.383–0.432) |
| PES 16 | 0.564 (0.440–0.621) | 0.018 (0.000–0.120) | 0.418 (0.379–0.461) |

## Supplementary Table S15. Results from bivariate genetic analyses illustrating the proportion of phenotypic variance explained by genetic, shared environmental and non-shared environmental factors

| **Pair** | **rA** | **rC** | **rE** |
| --- | --- | --- | --- |
| PES 7 – P 7 | 0.185 (0.136–0.235) | 0.018 (−0.026–0.062) | 0.034 (0.020–0.047) |
| PES 7 – P 9 | 0.188 (0.109–0.266) | 0.043 (−0.028–0.114) | 0.011 (−0.008–0.030) |
| PES 7 – P 16 | 0.187 (0.130–0.244) | 0.006 (−0.049–0.061) | 0.012 (−0.002–0.025) |
| PES 7 – P 21 | 0.085 (0.014–0.155) | 0.023 (−0.037–0.083) | 0.015 (−0.006–0.036) |
| PES 9 – P 9 | 0.451 (0.384–0.520) | 0.130 (0.069–0.189) | 0.102 (0.081–0.124) |
| PES 9 – P 16 | 0.204 (0.133–0.279) | 0.157 (0.091–0.214) | 0.027 (0.006–0.049) |
| PES 9 – P 21 | 0.253 (0.166–0.357) | 0.059 (0.003–0.123) | 0.003 (−0.034–0.039) |
| PES 16 – P 16 | 0.332 (0.261–0.403) | 0.079 (0.015–0.142) | 0.076 (0.058–0.095) |
| PES 16 – P 21 | 0.236 (0.165–0.312) | 0.079 (0.017–0.132) | 0.064 (0.035–0.094) |

## Supplementary Table S16.Correlations between the genomic P factor and educational experiences

| Time_off_school | -0.005 | -0.047 | 0.037 | 8.22E-01 | 2172 | 9.02E-01 |
| --- | --- | --- | --- | --- | --- | --- |
| Feel_sch | -0.024 | -0.055 | 0.007 | 1.30E-01 | 4055 | 3.83E-01 |
| Peer_parent | -0.026 | -0.071 | 0.019 | 2.52E-01 | 1919 | 5.16E-01 |
| Peer_teacher | 0.000 | -0.049 | 0.049 | 9.88E-01 | 1605 | 9.88E-01 |
| Peer_self | -0.049 | -0.094 | -0.004 | 3.40E-02 | 1880 | 1.88E-01 |
| Classroom_parent | -0.060 | -0.104 | -0.015 | 8.40E-03 | 1932 | 7.84E-02 |
| Classroom_teacher | 0.031 | -0.018 | 0.079 | 2.20E-01 | 1604 | 5.12E-01 |
| Classroom_self | -0.029 | -0.074 | 0.016 | 2.11E-01 | 1885 | 5.12E-01 |
| Teach_parent | -0.076 | -0.120 | -0.031 | 8.34E-04 | 1931 | 1.82E-02 |
| Teach_self | -0.020 | -0.065 | 0.026 | 3.96E-01 | 1884 | 6.17E-01 |
| NegAffect_parent | 0.058 | 0.014 | 0.103 | 1.04E-02 | 1931 | 8.22E-02 |
| NegAffect_self | 0.038 | -0.007 | 0.083 | 9.79E-02 | 1883 | 3.35E-01 |
| Adventure_parent | -0.047 | -0.092 | -0.003 | 3.69E-02 | 1931 | 1.88E-01 |
| Adventure_self | -0.009 | -0.054 | 0.036 | 6.86E-01 | 1885 | 8.17E-01 |
| Opportunity_parent | -0.031 | -0.076 | 0.013 | 1.67E-01 | 1929 | 4.46E-01 |
| Opportunity_self | 0.025 | -0.020 | 0.070 | 2.76E-01 | 1887 | 5.16E-01 |
| Acceptance_parent | -0.009 | -0.054 | 0.035 | 6.78E-01 | 1930 | 8.17E-01 |
| Acceptance_self | -0.016 | -0.061 | 0.029 | 4.96E-01 | 1886 | 7.12E-01 |
| Classsize | -0.006 | -0.055 | 0.043 | 8.16E-01 | 1611 | 9.02E-01 |
| HW_night_teacher | -0.028 | -0.077 | 0.021 | 2.68E-01 | 1594 | 5.16E-01 |
| HW_finish_teacher | -0.022 | -0.071 | 0.027 | 3.78E-01 | 1588 | 6.17E-01 |
| HW_others_teacher | 0.028 | -0.022 | 0.077 | 2.75E-01 | 1574 | 5.16E-01 |
| Student_teacher_relationship | -0.026 | -0.076 | 0.024 | 3.04E-01 | 1532 | 5.32E-01 |
| Relevance_schoolwork | 0.012 | -0.039 | 0.062 | 6.51E-01 | 1532 | 8.15E-01 |
| Peer_support | -0.001 | -0.051 | 0.049 | 9.59E-01 | 1530 | 9.88E-01 |
| Homework_behaviour | -0.043 | -0.092 | 0.007 | 9.47E-02 | 1543 | 3.35E-01 |
| HW_feedback | -0.029 | -0.079 | 0.021 | 2.59E-01 | 1530 | 5.16E-01 |
| Homework | -0.042 | -0.092 | 0.008 | 1.00E-01 | 1530 | 3.35E-01 |
| Attitudes_school | -0.033 | -0.082 | 0.017 | 2.02E-01 | 1543 | 5.12E-01 |
| Satisfaction_school | -0.078 | -0.126 | -0.029 | 1.70E-03 | 1619 | 2.14E-02 |
| Classroom_environment | -0.017 | -0.067 | 0.034 | 5.17E-01 | 1528 | 7.23E-01 |
| Classroom_help_peers | -0.048 | -0.098 | 0.002 | 6.09E-02 | 1519 | 2.84E-01 |
| Classroom_first_answer | 0.004 | -0.046 | 0.054 | 8.70E-01 | 1523 | 9.37E-01 |
| First_to_finish | 0.012 | -0.039 | 0.062 | 6.49E-01 | 1525 | 8.15E-01 |
| Show_each_other_work | -0.038 | -0.088 | 0.013 | 1.42E-01 | 1524 | 3.98E-01 |
| Tell_each_other_reports | -0.042 | -0.092 | 0.008 | 9.73E-02 | 1525 | 3.35E-01 |
| Teacher_makes_work_interesting | -0.029 | -0.079 | 0.021 | 2.60E-01 | 1524 | 5.16E-01 |
| Teacher_likes_work | -0.021 | -0.071 | 0.030 | 4.20E-01 | 1521 | 6.35E-01 |
| Teacher_explains_why | 0.016 | -0.035 | 0.066 | 5.38E-01 | 1517 | 7.35E-01 |
| Wait_long_time | 0.080 | 0.029 | 0.129 | 1.91E-03 | 1521 | 2.14E-02 |
| Teacher_shows_interest | -0.019 | -0.069 | 0.031 | 4.59E-01 | 1524 | 6.76E-01 |
| Express_opinions | -0.027 | -0.077 | 0.023 | 2.87E-01 | 1523 | 5.18E-01 |
| Teaching | -0.011 | -0.062 | 0.039 | 6.55E-01 | 1524 | 8.15E-01 |
| Teacher_help | 0.000 | -0.050 | 0.051 | 9.85E-01 | 1524 | 9.88E-01 |
| Teacher_homework_checks | -0.012 | -0.062 | 0.038 | 6.35E-01 | 1521 | 8.15E-01 |
| Cannot_work_well | 0.065 | 0.014 | 0.114 | 1.17E-02 | 1521 | 8.22E-02 |
| Do_not_listen | 0.084 | 0.034 | 0.134 | 9.73E-04 | 1521 | 1.82E-02 |
| Noise_disorder | 0.041 | -0.009 | 0.091 | 1.08E-01 | 1517 | 3.35E-01 |
| Doing_nothing | 0.022 | -0.028 | 0.072 | 3.94E-01 | 1523 | 6.17E-01 |
| Library | 0.006 | -0.044 | 0.056 | 8.06E-01 | 1529 | 9.02E-01 |
| Computers | -0.008 | -0.058 | 0.042 | 7.51E-01 | 1529 | 8.76E-01 |
| Internet | -0.003 | -0.053 | 0.047 | 9.05E-01 | 1529 | 9.57E-01 |
| Science_Lab | -0.041 | -0.091 | 0.009 | 1.05E-01 | 1529 | 3.35E-01 |
| Attitude_science | -0.084 | -0.134 | -0.035 | 9.28E-04 | 1535 | 1.82E-02 |
| Attitude_maths | -0.059 | -0.109 | -0.009 | 2.11E-02 | 1533 | 1.31E-01 |
| Attitude_English | 0.023 | -0.027 | 0.073 | 3.59E-01 | 1534 | 6.09E-01 |

## Supplementary Table S17.Correlations between educational experiences and mental health at age 21

| Variable | r | 95% CI | | p | N | p_fdr |
| --- | --- | --- | --- | --- | --- | --- |
| Time_off_school | 0.026 | -0.012 | 0.064 | 1.85E-01 | 2651 | 2.03E-01 |
| Feel_sch | -0.141 | -0.168 | -0.113 | 7.24E-23 | 4862 | 5.80E-22 |
| Peer_parent | -0.197 | -0.235 | -0.158 | 3.12E-22 | 2389 | 2.19E-21 |
| Peer_teacher | -0.121 | -0.164 | -0.077 | 7.82E-08 | 1964 | 1.46E-07 |
| Peer_self | -0.159 | -0.198 | -0.119 | 7.65E-15 | 2360 | 2.86E-14 |
| Classroom_parent | -0.240 | -0.277 | -0.202 | 8.65E-33 | 2402 | 2.42E-31 |
| Classroom_teacher | -0.171 | -0.214 | -0.128 | 2.47E-14 | 1962 | 8.15E-14 |
| Classroom_self | -0.103 | -0.143 | -0.063 | 5.27E-07 | 2368 | 9.52E-07 |
| Teach_parent | -0.166 | -0.205 | -0.127 | 2.70E-16 | 2400 | 1.08E-15 |
| Teach_self | -0.080 | -0.120 | -0.040 | 9.01E-05 | 2367 | 1.29E-04 |
| NegAffect_parent | 0.226 | 0.188 | 0.264 | 2.94E-29 | 2400 | 5.49E-28 |
| NegAffect_self | 0.154 | 0.114 | 0.193 | 5.44E-14 | 2364 | 1.69E-13 |
| Adventure_parent | -0.155 | -0.194 | -0.116 | 1.89E-14 | 2402 | 6.61E-14 |
| Adventure_self | -0.073 | -0.113 | -0.033 | 3.52E-04 | 2366 | 4.81E-04 |
| Opportunity_parent | -0.148 | -0.187 | -0.109 | 2.83E-13 | 2400 | 8.33E-13 |
| Opportunity_self | -0.063 | -0.103 | -0.023 | 2.06E-03 | 2367 | 2.69E-03 |
| Acceptance_parent | -0.217 | -0.255 | -0.179 | 4.84E-27 | 2402 | 6.77E-26 |
| Acceptance_self | -0.207 | -0.246 | -0.169 | 2.04E-24 | 2368 | 1.90E-23 |
| Classsize | -0.022 | -0.066 | 0.022 | 3.29E-01 | 1971 | 3.41E-01 |
| HW_night_teacher | -0.029 | -0.073 | 0.015 | 1.97E-01 | 1952 | 2.13E-01 |
| HW_finish_teacher | -0.159 | -0.202 | -0.115 | 1.93E-12 | 1947 | 5.42E-12 |
| HW_others_teacher | 0.019 | -0.026 | 0.063 | 4.11E-01 | 1920 | 4.19E-01 |
| Student_teacher_relationship | -0.120 | -0.161 | -0.078 | 2.01E-08 | 2177 | 4.33E-08 |
| Relevance_schoolwork | -0.146 | -0.187 | -0.104 | 8.34E-12 | 2175 | 2.22E-11 |
| Peer_support | -0.192 | -0.232 | -0.151 | 1.79E-19 | 2174 | 1.01E-18 |
| Homework_behaviour | -0.204 | -0.244 | -0.163 | 5.11E-22 | 2193 | 3.18E-21 |
| HW_feedback | -0.100 | -0.142 | -0.059 | 2.76E-06 | 2176 | 4.68E-06 |
| Homework | -0.176 | -0.216 | -0.135 | 1.59E-16 | 2176 | 6.86E-16 |
| Attitudes_school | -0.219 | -0.258 | -0.178 | 4.04E-25 | 2193 | 4.52E-24 |
| Satisfaction_school | -0.310 | -0.347 | -0.273 | 3.55E-52 | 2282 | 1.99E-50 |
| Classroom_environment | -0.009 | -0.051 | 0.033 | 6.59E-01 | 2174 | 6.59E-01 |
| Classroom_help_peers | -0.097 | -0.139 | -0.055 | 5.81E-06 | 2160 | 9.29E-06 |
| Classroom_first_answer | 0.055 | 0.013 | 0.097 | 9.93E-03 | 2166 | 1.26E-02 |
| First_to_finish | 0.049 | 0.007 | 0.091 | 2.29E-02 | 2166 | 2.73E-02 |
| Show_each_other_work | -0.070 | -0.112 | -0.028 | 1.06E-03 | 2165 | 1.41E-03 |
| Tell_each_other_reports | -0.053 | -0.095 | -0.011 | 1.40E-02 | 2162 | 1.71E-02 |
| Teacher_makes_work_interesting | -0.096 | -0.138 | -0.054 | 7.45E-06 | 2165 | 1.16E-05 |
| Teacher_likes_work | -0.086 | -0.128 | -0.044 | 6.44E-05 | 2159 | 9.50E-05 |
| Teacher_explains_why | 0.033 | -0.009 | 0.075 | 1.27E-01 | 2158 | 1.45E-01 |
| Wait_long_time | 0.134 | 0.093 | 0.175 | 3.59E-10 | 2163 | 9.14E-10 |
| Teacher_shows_interest | -0.120 | -0.161 | -0.078 | 2.42E-08 | 2163 | 4.84E-08 |
| Express_opinions | -0.116 | -0.158 | -0.074 | 5.98E-08 | 2164 | 1.16E-07 |
| Teaching | -0.120 | -0.161 | -0.078 | 2.38E-08 | 2163 | 4.84E-08 |
| Teacher_help | -0.104 | -0.146 | -0.062 | 1.23E-06 | 2165 | 2.16E-06 |
| Teacher_homework_checks | -0.084 | -0.126 | -0.042 | 9.66E-05 | 2156 | 1.35E-04 |
| Cannot_work_well | 0.129 | 0.088 | 0.171 | 1.56E-09 | 2161 | 3.79E-09 |
| Do_not_listen | 0.188 | 0.147 | 0.229 | 1.07E-18 | 2164 | 5.43E-18 |
| Noise_disorder | 0.182 | 0.141 | 0.222 | 1.81E-17 | 2154 | 8.46E-17 |
| Doing_nothing | 0.124 | 0.082 | 0.165 | 8.14E-09 | 2162 | 1.90E-08 |
| Library | 0.030 | -0.012 | 0.072 | 1.59E-01 | 2175 | 1.78E-01 |
| Computers | -0.053 | -0.095 | -0.011 | 1.37E-02 | 2175 | 1.70E-02 |
| Internet | -0.043 | -0.085 | -0.001 | 4.36E-02 | 2175 | 5.09E-02 |
| Science_Lab | -0.088 | -0.130 | -0.046 | 3.86E-05 | 2174 | 5.84E-05 |
| Attitude_science | -0.099 | -0.140 | -0.057 | 3.66E-06 | 2184 | 6.03E-06 |
| Attitude_maths | -0.121 | -0.162 | -0.080 | 1.34E-08 | 2183 | 3.00E-08 |
| Attitude_English | -0.027 | -0.069 | 0.015 | 2.01E-01 | 2182 | 2.13E-01 |

## Supplementary Table S18.Correlations between educational experiences and mental health at age 21, when controlling for SES

| Variable | r | 95% CI | | p | N | p_fdr |
| --- | --- | --- | --- | --- | --- | --- |
| Time_off_school | 0.026 | -0.014 | 0.065 | 2.07E-01 | 2446 | 2.27E-01 |
| Feel_sch | -0.135 | -0.163 | -0.106 | 8.72E-20 | 4515 | 6.98E-19 |
| Peer_parent | -0.187 | -0.227 | -0.147 | 3.39E-19 | 2250 | 2.37E-18 |
| Peer_teacher | -0.101 | -0.146 | -0.056 | 1.35E-05 | 1840 | 2.22E-05 |
| Peer_self | -0.166 | -0.206 | -0.125 | 3.82E-15 | 2219 | 1.78E-14 |
| Classroom_parent | -0.244 | -0.283 | -0.205 | 4.91E-32 | 2261 | 1.37E-30 |
| Classroom_teacher | -0.155 | -0.199 | -0.110 | 2.29E-11 | 1838 | 6.76E-11 |
| Classroom_self | -0.112 | -0.153 | -0.071 | 1.18E-07 | 2227 | 2.63E-07 |
| Teach_parent | -0.174 | -0.214 | -0.134 | 7.17E-17 | 2259 | 4.01E-16 |
| Teach_self | -0.088 | -0.129 | -0.047 | 3.10E-05 | 2226 | 4.82E-05 |
| NegAffect_parent | 0.226 | 0.186 | 0.265 | 1.65E-27 | 2259 | 2.31E-26 |
| NegAffect_self | 0.160 | 0.120 | 0.201 | 2.83E-14 | 2223 | 1.13E-13 |
| Adventure_parent | -0.154 | -0.194 | -0.114 | 1.57E-13 | 2261 | 5.50E-13 |
| Adventure_self | -0.082 | -0.123 | -0.040 | 1.11E-04 | 2225 | 1.64E-04 |
| Opportunity_parent | -0.144 | -0.184 | -0.103 | 6.76E-12 | 2258 | 2.10E-11 |
| Opportunity_self | -0.069 | -0.110 | -0.028 | 1.12E-03 | 2226 | 1.52E-03 |
| Acceptance_parent | -0.229 | -0.268 | -0.190 | 2.67E-28 | 2261 | 4.99E-27 |
| Acceptance_self | -0.211 | -0.250 | -0.171 | 9.02E-24 | 2227 | 1.01E-22 |
| Classsize | -0.028 | -0.073 | 0.018 | 2.34E-01 | 1848 | 2.47E-01 |
| HW_night_teacher | -0.013 | -0.059 | 0.033 | 5.68E-01 | 1828 | 5.68E-01 |
| HW_finish_teacher | -0.137 | -0.182 | -0.092 | 3.92E-09 | 1826 | 1.05E-08 |
| HW_others_teacher | 0.016 | -0.030 | 0.062 | 4.97E-01 | 1799 | 5.06E-01 |
| Student_teacher_relationship | -0.124 | -0.167 | -0.081 | 1.72E-08 | 2049 | 4.38E-08 |
| Relevance_schoolwork | -0.140 | -0.182 | -0.097 | 1.95E-10 | 2047 | 5.45E-10 |
| Peer_support | -0.195 | -0.237 | -0.153 | 4.67E-19 | 2046 | 2.91E-18 |
| Homework_behaviour | -0.176 | -0.218 | -0.134 | 8.40E-16 | 2061 | 4.28E-15 |
| HW_feedback | -0.109 | -0.152 | -0.066 | 7.01E-07 | 2048 | 1.31E-06 |
| Homework | -0.167 | -0.209 | -0.125 | 2.53E-14 | 2048 | 1.09E-13 |
| Attitudes_school | -0.200 | -0.241 | -0.158 | 6.09E-20 | 2061 | 5.68E-19 |
| Satisfaction_school | -0.301 | -0.339 | -0.262 | 4.61E-46 | 2142 | 2.58E-44 |
| Classroom_environment | -0.024 | -0.067 | 0.019 | 2.75E-01 | 2046 | 2.85E-01 |
| Classroom_help_peers | -0.094 | -0.137 | -0.051 | 2.13E-05 | 2032 | 3.40E-05 |
| Classroom_first_answer | 0.058 | 0.015 | 0.101 | 8.48E-03 | 2038 | 1.10E-02 |
| First_to_finish | 0.051 | 0.008 | 0.095 | 2.01E-02 | 2038 | 2.45E-02 |
| Show_each_other_work | -0.057 | -0.100 | -0.013 | 1.07E-02 | 2037 | 1.37E-02 |
| Tell_each_other_reports | -0.052 | -0.095 | -0.008 | 1.93E-02 | 2034 | 2.40E-02 |
| Teacher_makes_work_interesting | -0.102 | -0.144 | -0.058 | 4.30E-06 | 2037 | 7.53E-06 |
| Teacher_likes_work | -0.086 | -0.129 | -0.042 | 1.08E-04 | 2031 | 1.63E-04 |
| Teacher_explains_why | 0.026 | -0.017 | 0.070 | 2.34E-01 | 2030 | 2.47E-01 |
| Wait_long_time | 0.121 | 0.078 | 0.164 | 4.44E-08 | 2035 | 1.08E-07 |
| Teacher_shows_interest | -0.117 | -0.159 | -0.074 | 1.28E-07 | 2036 | 2.76E-07 |
| Express_opinions | -0.111 | -0.154 | -0.068 | 5.43E-07 | 2036 | 1.09E-06 |
| Teaching | -0.116 | -0.158 | -0.073 | 1.63E-07 | 2035 | 3.39E-07 |
| Teacher_help | -0.100 | -0.143 | -0.057 | 5.76E-06 | 2037 | 9.77E-06 |
| Teacher_homework_checks | -0.080 | -0.123 | -0.037 | 3.00E-04 | 2030 | 4.30E-04 |
| Cannot_work_well | 0.110 | 0.067 | 0.153 | 6.08E-07 | 2035 | 1.17E-06 |
| Do_not_listen | 0.167 | 0.124 | 0.209 | 3.48E-14 | 2036 | 1.30E-13 |
| Noise_disorder | 0.162 | 0.119 | 0.204 | 2.29E-13 | 2027 | 7.53E-13 |
| Doing_nothing | 0.109 | 0.066 | 0.152 | 7.86E-07 | 2034 | 1.42E-06 |
| Library | 0.038 | -0.005 | 0.081 | 8.34E-02 | 2047 | 9.35E-02 |
| Computers | -0.046 | -0.089 | -0.003 | 3.67E-02 | 2047 | 4.38E-02 |
| Internet | -0.044 | -0.087 | 0.000 | 4.91E-02 | 2047 | 5.73E-02 |
| Science_Lab | -0.071 | -0.114 | -0.028 | 1.31E-03 | 2046 | 1.74E-03 |
| Attitude_science | -0.072 | -0.115 | -0.029 | 1.02E-03 | 2055 | 1.43E-03 |
| Attitude_maths | -0.119 | -0.162 | -0.076 | 6.13E-08 | 2054 | 1.43E-07 |
| Attitude_English | -0.043 | -0.086 | 0.000 | 5.09E-02 | 2053 | 5.81E-02 |

## Supplementary Table S19.Correlations between teacher-reported mental health and parent- and child-reported educational experiences

| **Age 7** |  |  |  |  |  |  |
| --- | --- | --- | --- | --- | --- | --- |
| Variable | r | 95% CI | | p | N | p_fdr |
| Time_off_school | 0.046 | 0.008 | 0.084 | 1.74E-02 | 2665 | 1.74E-02 |
| Feel_sch | -0.085 | -0.112 | -0.057 | 3.49E-09 | 4869 | 6.99E-09 |
|  |  |  |  |  |  |  |
| **Age 9** |  |  |  |  |  |  |
| Variable | r | 95% CI | | p | N | p_fdr |
| Peer_parent | -0.259 | -0.296 | -0.221 | 1.27E-38 | 2437 | 8.90E-38 |
| Peer_self | -0.093 | -0.132 | -0.053 | 5.46E-06 | 2395 | 6.38E-06 |
| Classroom_parent | -0.243 | -0.280 | -0.205 | 3.72E-34 | 2448 | 1.73E-33 |
| Classroom_self | -0.130 | -0.169 | -0.090 | 1.81E-10 | 2401 | 2.31E-10 |
| Teach_parent | -0.183 | -0.221 | -0.144 | 8.85E-20 | 2447 | 1.55E-19 |
| Teach_self | -0.147 | -0.186 | -0.107 | 4.94E-13 | 2400 | 6.92E-13 |
| NegAffect_parent | 0.187 | 0.149 | 0.225 | 9.53E-21 | 2448 | 1.91E-20 |
| NegAffect_self | 0.208 | 0.169 | 0.246 | 8.00E-25 | 2398 | 2.24E-24 |
| Adventure_parent | -0.232 | -0.269 | -0.194 | 3.12E-31 | 2447 | 1.09E-30 |
| Adventure_self | -0.075 | -0.115 | -0.035 | 2.37E-04 | 2399 | 2.37E-04 |
| Opportunity_parent | -0.150 | -0.188 | -0.111 | 9.42E-14 | 2446 | 1.46E-13 |
| Opportunity_self | -0.085 | -0.124 | -0.045 | 3.26E-05 | 2399 | 3.51E-05 |
| Acceptance_parent | -0.315 | -0.350 | -0.279 | 2.13E-57 | 2448 | 2.98E-56 |
| Acceptance_self | -0.194 | -0.232 | -0.155 | 7.40E-22 | 2402 | 1.73E-21 |

## Supplementary Table S20.Correlations between parent-reported mental health and teacher- and child-reported educational experiences

| **Age 9** |  |  |  |  |  |  |
| --- | --- | --- | --- | --- | --- | --- |
| Variable | r | 95% CI | | p | N | p_fdr |
| Peer_teacher | -0.215 | -0.253 | -0.177 | 3.71E-27 | 2453 | 9.66E-27 |
| Peer_self | -0.147 | -0.181 | -0.114 | 2.20E-17 | 3282 | 4.08E-17 |
| Classroom_teacher | -0.236 | -0.273 | -0.199 | 1.72E-32 | 2451 | 5.59E-32 |
| Classroom_self | -0.171 | -0.204 | -0.138 | 4.22E-23 | 3291 | 9.15E-23 |
| Teach_self | -0.135 | -0.169 | -0.102 | 6.89E-15 | 3288 | 1.12E-14 |
| NegAffect_self | 0.288 | 0.256 | 0.319 | 9.78E-64 | 3288 | 1.27E-62 |
| Adventure_self | -0.085 | -0.118 | -0.051 | 1.20E-06 | 3290 | 1.56E-06 |
| Opportunity_self | -0.103 | -0.137 | -0.070 | 2.70E-09 | 3290 | 3.91E-09 |
| Acceptance_self | -0.245 | -0.277 | -0.213 | 2.90E-46 | 3293 | 1.89E-45 |
| Classsize | 0.001 | -0.038 | 0.041 | 9.47E-01 | 2460 | 9.47E-01 |
| HW_night_teacher | -0.022 | -0.061 | 0.018 | 2.85E-01 | 2438 | 3.37E-01 |
| HW_finish_teacher | -0.256 | -0.293 | -0.218 | 9.00E-38 | 2438 | 3.90E-37 |
| HW_others_teacher | -0.006 | -0.046 | 0.034 | 7.74E-01 | 2400 | 8.39E-01 |
|  |  |  |  |  |  |  |
| **Age 16** |  |  |  |  |  |  |
| Variable | r | 95% CI | | p | N | p_fdr |
| Student_teacher_relationship | -0.134 | -0.177 | -0.091 | 1.41E-09 | 2016 | 3.00E-09 |
| Relevance_schoolwork | -0.145 | -0.187 | -0.102 | 6.44E-11 | 2014 | 1.69E-10 |
| Peer_support | -0.133 | -0.176 | -0.090 | 2.04E-09 | 2013 | 3.85E-09 |
| Homework_behaviour | -0.265 | -0.305 | -0.224 | 4.92E-34 | 2033 | 8.36E-33 |
| HW_feedback | -0.093 | -0.137 | -0.050 | 2.64E-05 | 2014 | 3.59E-05 |
| Homework | -0.199 | -0.240 | -0.156 | 2.16E-19 | 2014 | 1.83E-18 |
| Attitudes_school | -0.243 | -0.283 | -0.201 | 1.32E-28 | 2033 | 1.49E-27 |
| Satisfaction_school | -0.311 | -0.350 | -0.272 | 2.31E-48 | 2096 | 7.84E-47 |
| Classroom_environment | -0.009 | -0.053 | 0.035 | 6.85E-01 | 2013 | 7.06E-01 |
| Classroom_help_peers | -0.121 | -0.164 | -0.078 | 5.50E-08 | 2003 | 8.90E-08 |
| Classroom_first_answer | -0.016 | -0.059 | 0.028 | 4.84E-01 | 2005 | 5.14E-01 |
| First_to_finish | -0.005 | -0.049 | 0.038 | 8.06E-01 | 2007 | 8.06E-01 |
| Show_each_other_work | -0.111 | -0.154 | -0.068 | 5.85E-07 | 2006 | 8.65E-07 |
| Tell_each_other_reports | -0.076 | -0.119 | -0.032 | 6.89E-04 | 2003 | 9.01E-04 |
| Teacher_makes_work_interesting | -0.122 | -0.165 | -0.078 | 4.62E-08 | 2005 | 7.85E-08 |
| Teacher_likes_work | -0.125 | -0.168 | -0.082 | 1.93E-08 | 2000 | 3.45E-08 |
| Teacher_explains_why | -0.032 | -0.076 | 0.012 | 1.55E-01 | 1999 | 1.82E-01 |
| Wait_long_time | 0.182 | 0.140 | 0.224 | 1.85E-16 | 2003 | 1.00E-15 |
| Teacher_shows_interest | -0.134 | -0.176 | -0.090 | 2.01E-09 | 2002 | 3.85E-09 |
| Express_opinions | -0.136 | -0.179 | -0.093 | 1.05E-09 | 2002 | 2.54E-09 |
| Teaching | -0.157 | -0.199 | -0.114 | 1.81E-12 | 2004 | 5.60E-12 |
| Teacher_help | -0.150 | -0.192 | -0.107 | 1.67E-11 | 2004 | 4.72E-11 |
| Teacher_homework_checks | -0.136 | -0.178 | -0.092 | 1.17E-09 | 1996 | 2.66E-09 |
| Cannot_work_well | 0.184 | 0.141 | 0.226 | 1.08E-16 | 1999 | 7.32E-16 |
| Do_not_listen | 0.182 | 0.140 | 0.224 | 2.06E-16 | 2002 | 1.00E-15 |
| Noise_disorder | 0.171 | 0.128 | 0.213 | 1.49E-14 | 1994 | 5.62E-14 |
| Doing_nothing | 0.157 | 0.114 | 0.200 | 1.45E-12 | 2002 | 4.93E-12 |
| Library | -0.018 | -0.062 | 0.026 | 4.18E-01 | 2013 | 4.59E-01 |
| Computers | -0.074 | -0.117 | -0.030 | 9.44E-04 | 2013 | 1.19E-03 |
| Internet | -0.046 | -0.090 | -0.002 | 3.86E-02 | 2013 | 4.68E-02 |
| Science_Lab | -0.176 | -0.218 | -0.133 | 1.95E-15 | 2012 | 8.28E-15 |
| Attitude_science | -0.107 | -0.150 | -0.064 | 1.47E-06 | 2022 | 2.08E-06 |
| Attitude_maths | -0.113 | -0.156 | -0.070 | 3.35E-07 | 2022 | 5.18E-07 |
| Attitude_English | -0.030 | -0.073 | 0.014 | 1.85E-01 | 2019 | 2.09E-01 |
